# Supplementary material for: A One-Pot Approach to Pyridyl Isothiocyanates from Amines
Source: MDPI journal article supplement (doi:10.3390/molecules190913631), 2014-09-02

## Supplementary Materials

### Table of contents

|                                                                       |     |
|-----------------------------------------------------------------------|-----|
| <sup>1</sup> H- and <sup>13</sup> C-NMR spectra of compound <b>4a</b> | S2  |
| <sup>1</sup> H- and <sup>13</sup> C-NMR spectra of compound <b>4b</b> | S3  |
| <sup>1</sup> H- and <sup>13</sup> C-NMR spectra of compound <b>4c</b> | S4  |
| <sup>1</sup> H- and <sup>13</sup> C-NMR spectra of compound <b>4d</b> | S5  |
| <sup>1</sup> H- and <sup>13</sup> C-NMR spectra of compound <b>4e</b> | S6  |
| <sup>1</sup> H- and <sup>13</sup> C-NMR spectra of compound <b>4f</b> | S7  |
| <sup>1</sup> H- and <sup>13</sup> C-NMR spectra of compound <b>4g</b> | S8  |
| <sup>1</sup> H- and <sup>13</sup> C-NMR spectra of compound <b>4h</b> | S9  |
| <sup>1</sup> H- and <sup>13</sup> C-NMR spectra of compound <b>4i</b> | S10 |
| <sup>1</sup> H- and <sup>13</sup> C-NMR spectra of compound <b>4j</b> | S11 |
| <sup>1</sup> H- and <sup>13</sup> C-NMR spectra of compound <b>4k</b> | S12 |
| <sup>1</sup> H- and <sup>13</sup> C-NMR spectra of compound <b>4l</b> | S13 |
| <sup>1</sup> H- and <sup>13</sup> C-NMR spectra of compound <b>4m</b> | S14 |
| <sup>1</sup> H- and <sup>13</sup> C-NMR spectra of compound <b>4n</b> | S15 |
| <sup>1</sup> H- and <sup>13</sup> C-NMR spectra of compound <b>4o</b> | S16 |
| <sup>1</sup> H- and <sup>13</sup> C-NMR spectra of compound <b>4p</b> | S17 |
| <sup>1</sup> H- and <sup>13</sup> C-NMR spectra of compound <b>4q</b> | S18 |
| <sup>1</sup> H- and <sup>13</sup> C-NMR spectra of compound <b>4r</b> | S19 |
| <sup>1</sup> H- and <sup>13</sup> C-NMR spectra of compound <b>4s</b> | S20 |
| <sup>1</sup> H- and <sup>13</sup> C-NMR spectra of compound <b>4t</b> | S21 |

Figure S1. <sup>1</sup>H-NMR spectra of compound 4a.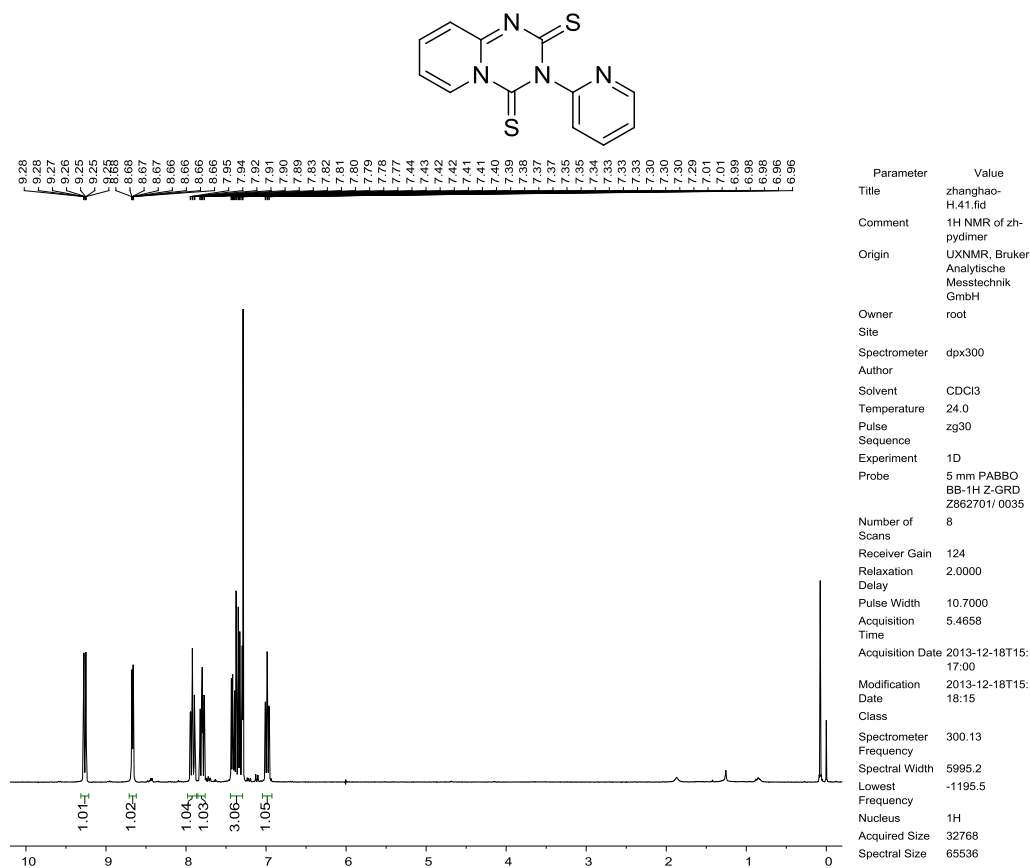Figure S2. <sup>13</sup>C-NMR spectra of compound 4a.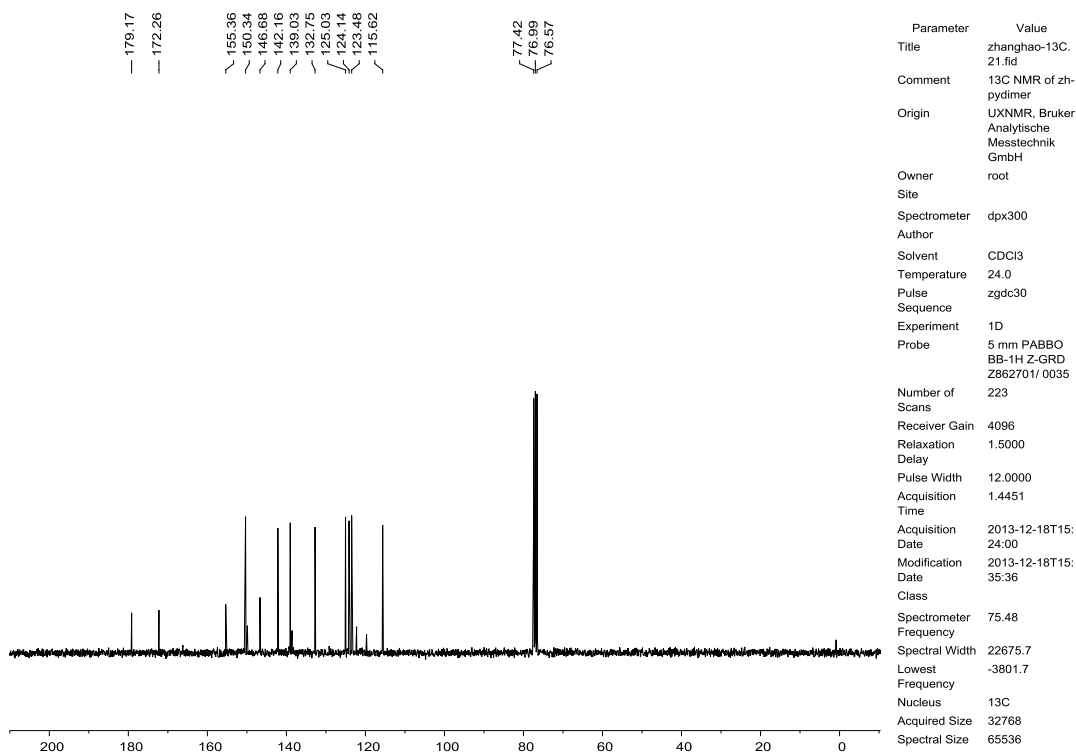

Figure S3. <sup>1</sup>H-NMR spectra of compound 4b.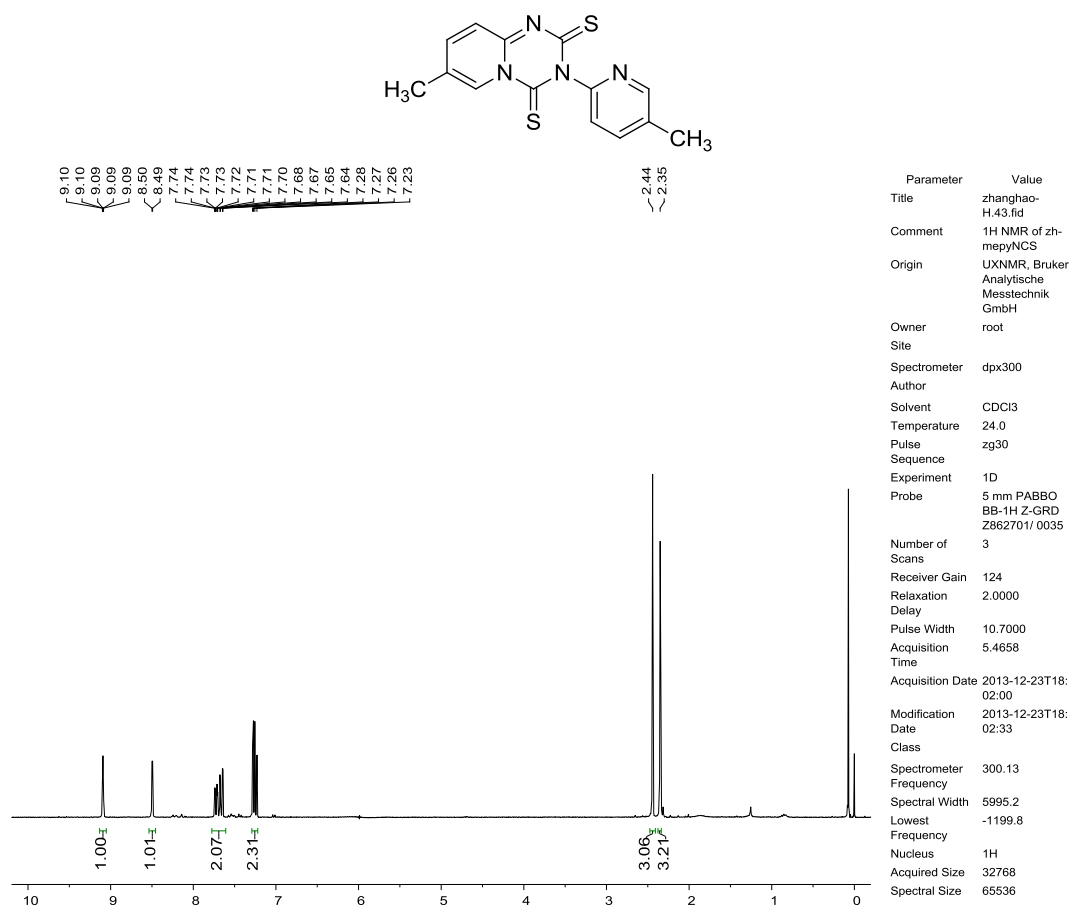Figure S4. <sup>13</sup>C-NMR spectra of compound 4b.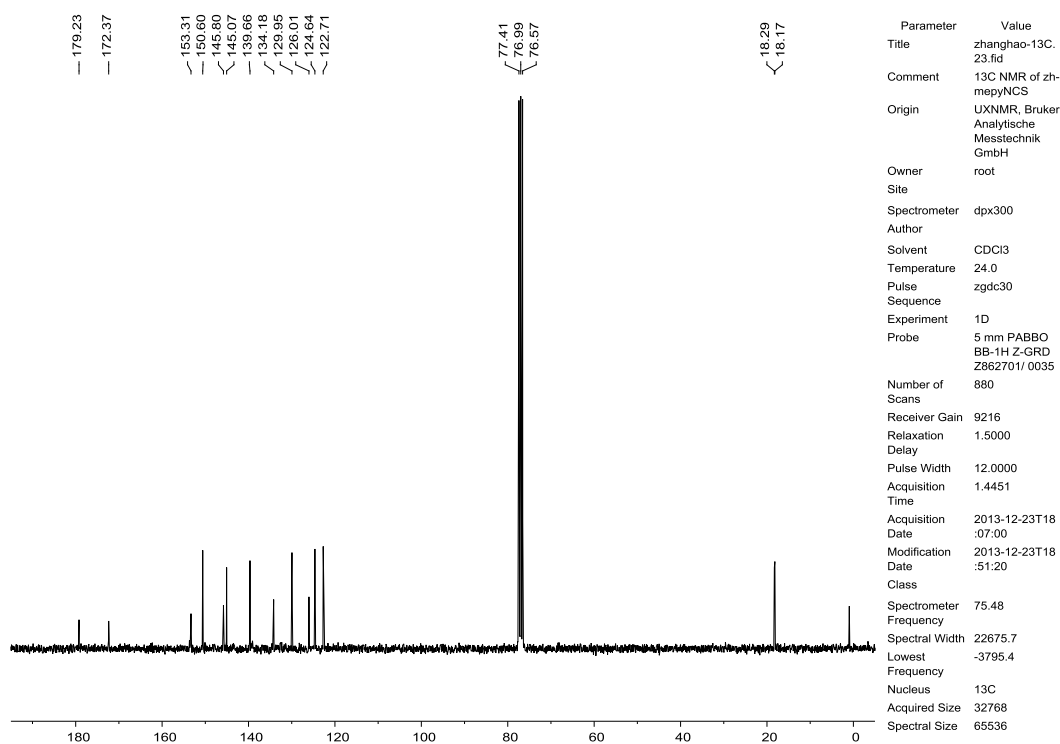

Figure S5.  $^1\text{H}$ -NMR spectra of compound **4c**.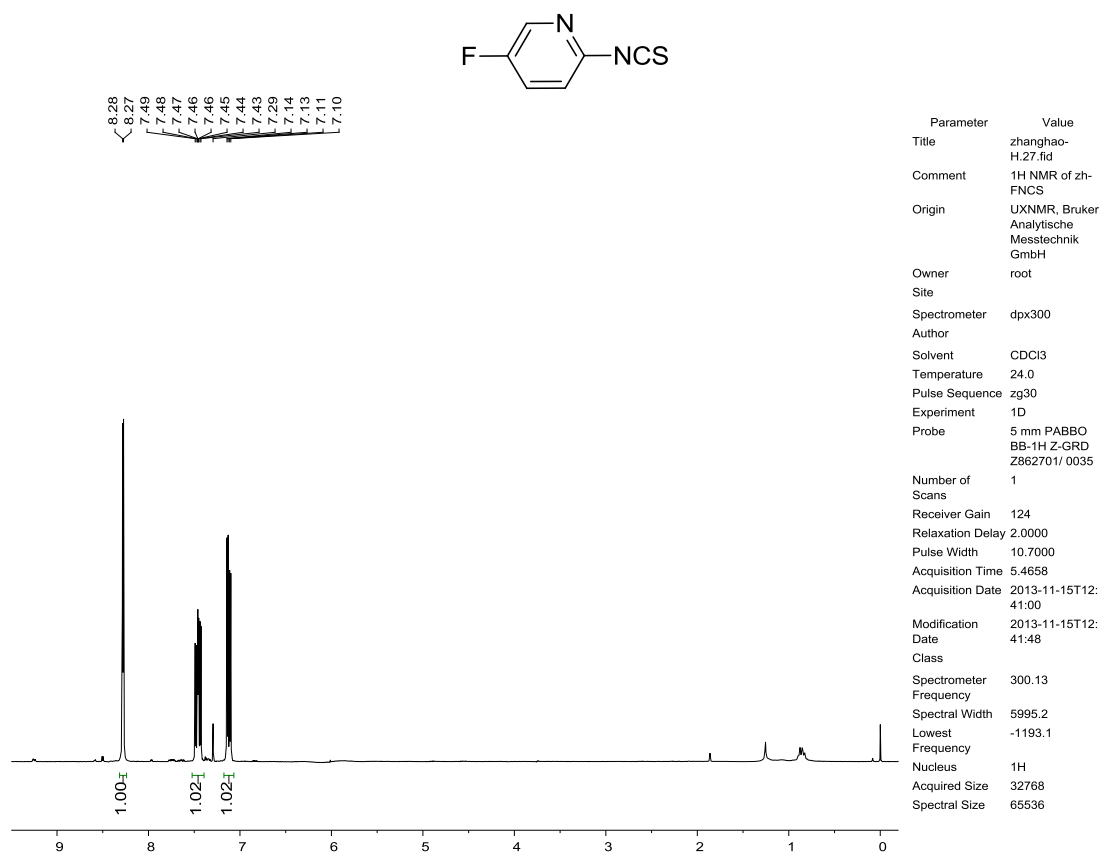Figure S6.  $^{13}\text{C}$ -NMR spectra of compound **4c**.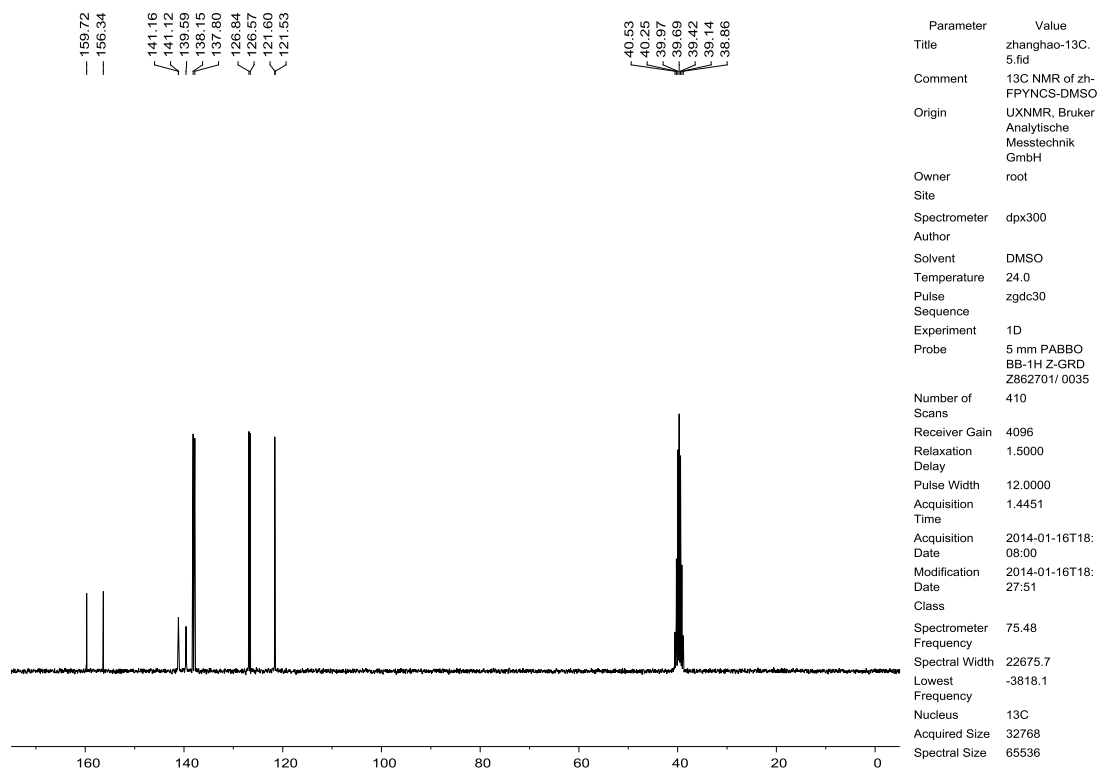

Figure S7.  $^1\text{H}$ -NMR spectra of compound **4d**.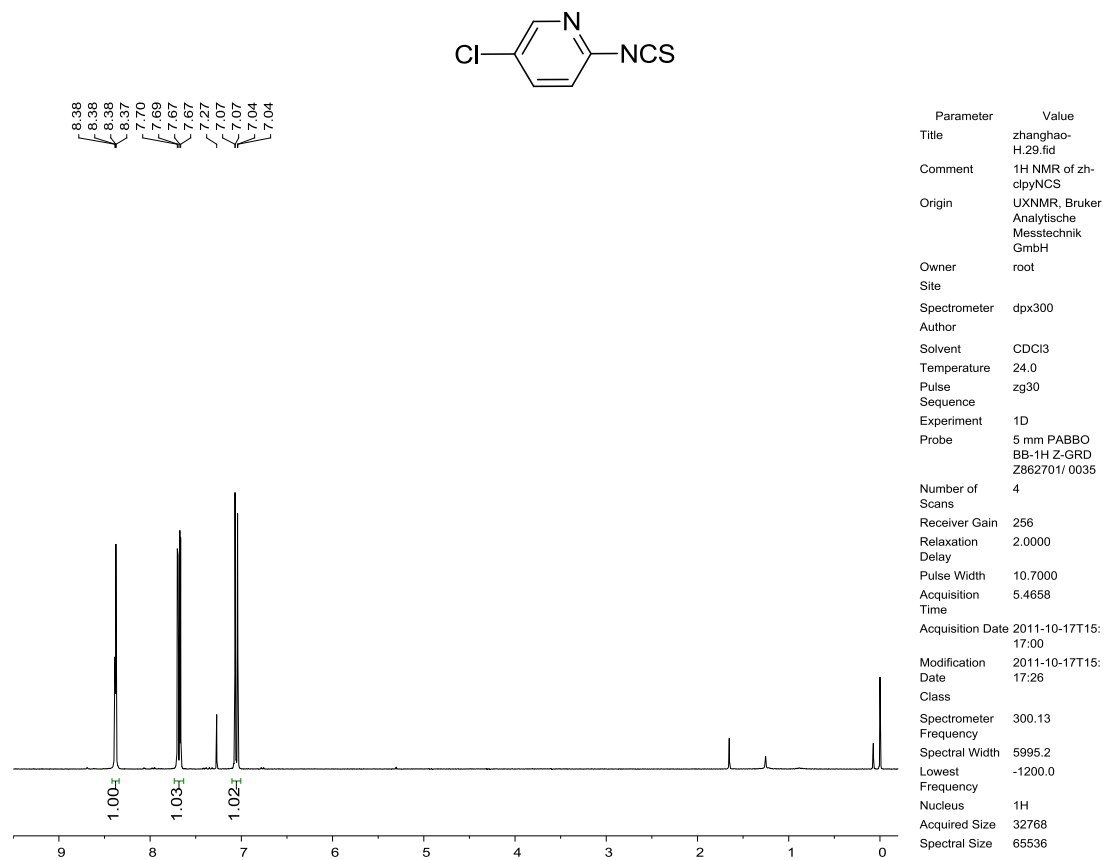Figure S8.  $^{13}\text{C}$ -NMR spectra of compound **4d**.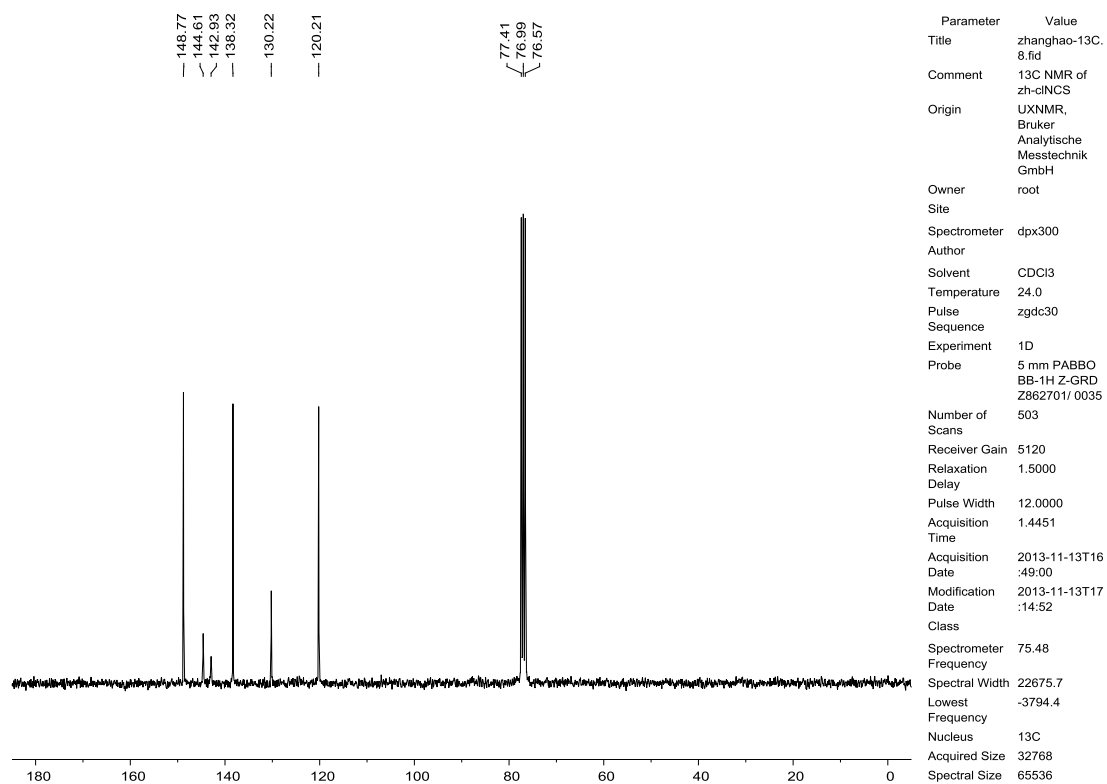

Figure S9. <sup>1</sup>H-NMR spectra of compound 4e.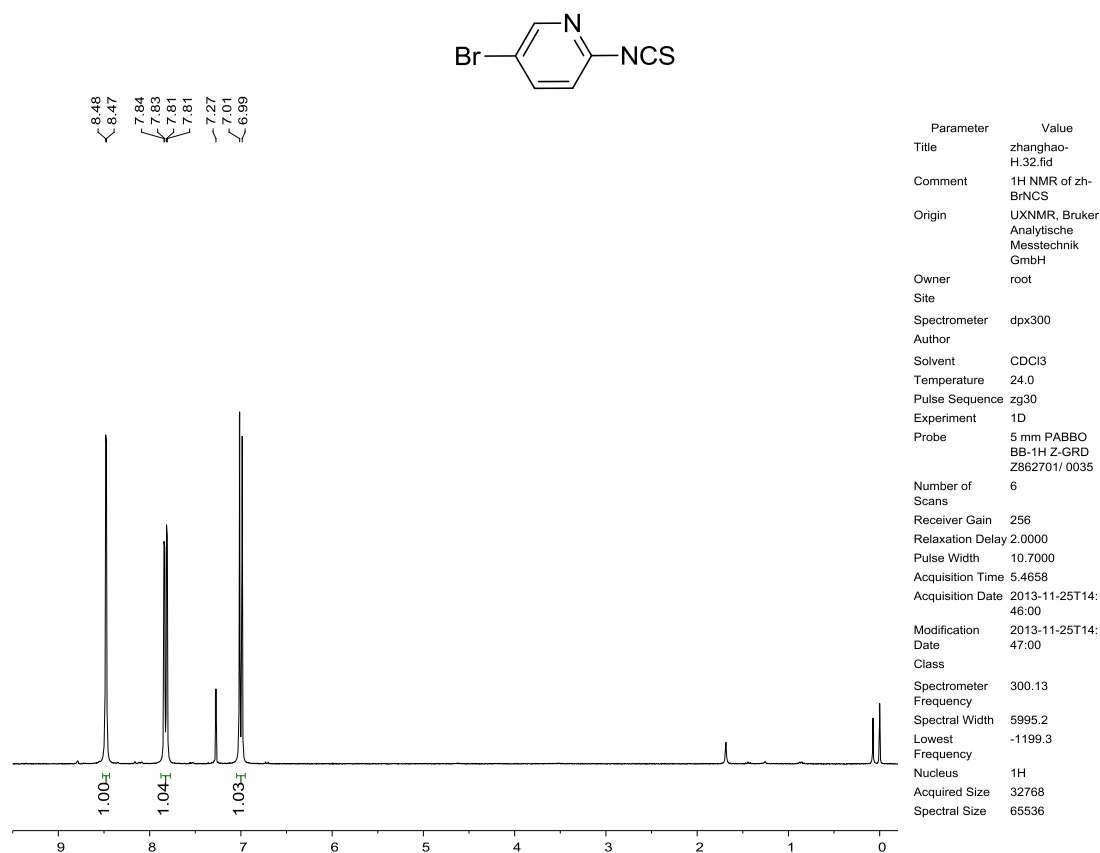Figure S10. <sup>13</sup>C-NMR spectra of compound 4e.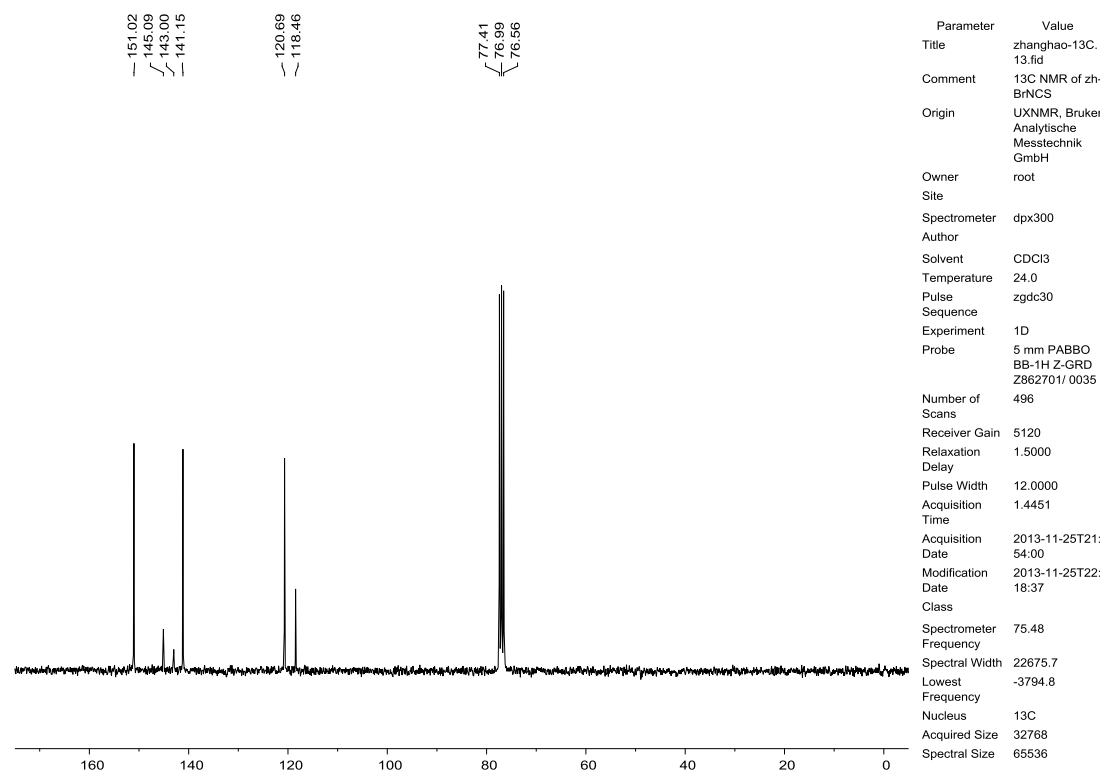

Figure S11.  $^1\text{H}$ -NMR spectra of compound 4f.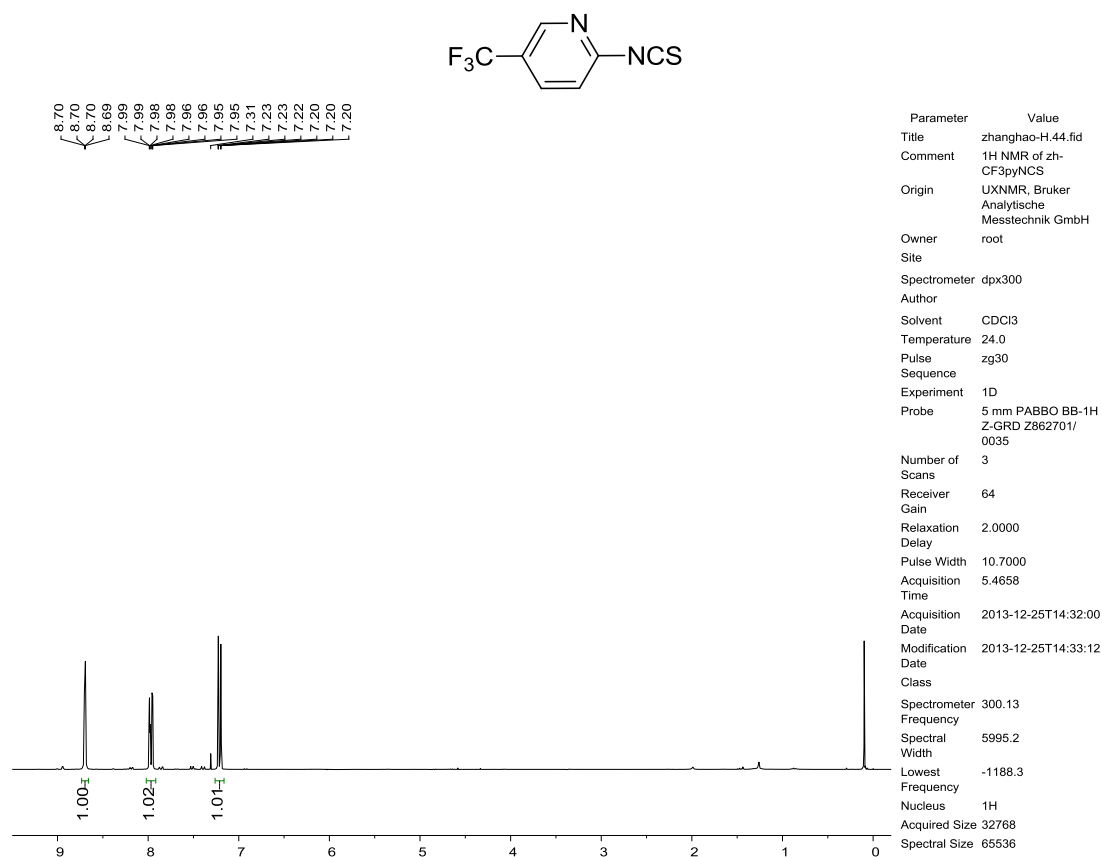Figure S12.  $^{13}\text{C}$ -NMR spectra of compound 4f.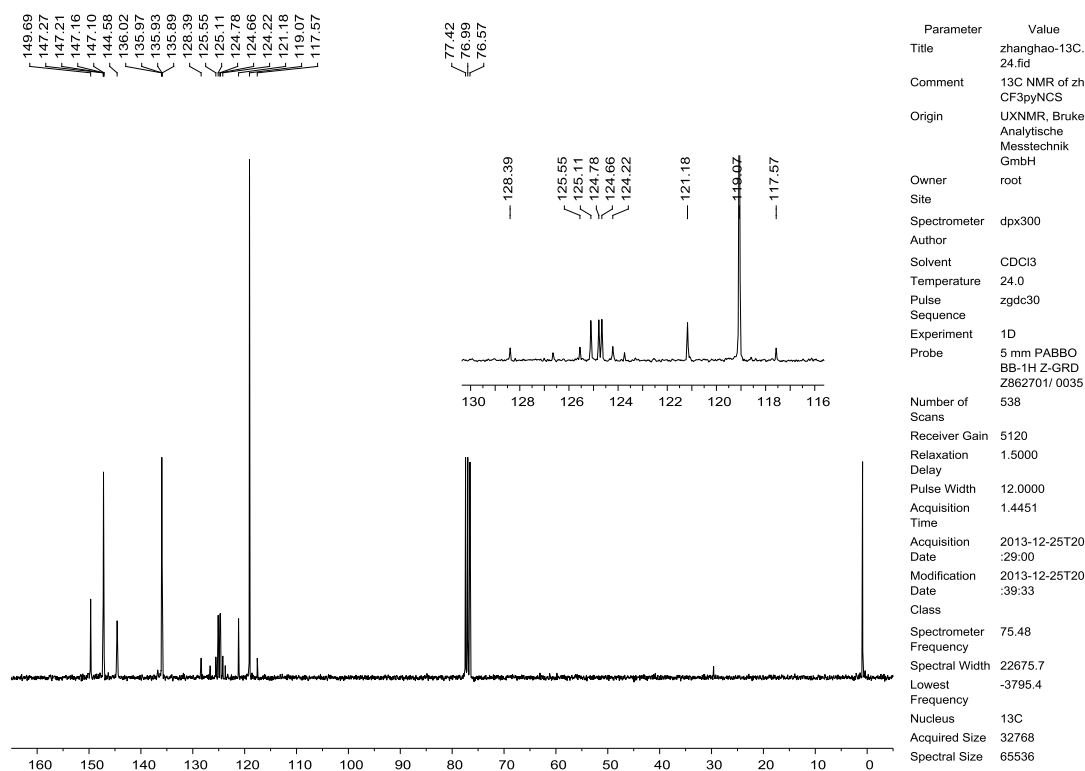

Figure S13.  $^1\text{H}$ -NMR spectra of compound **4g**.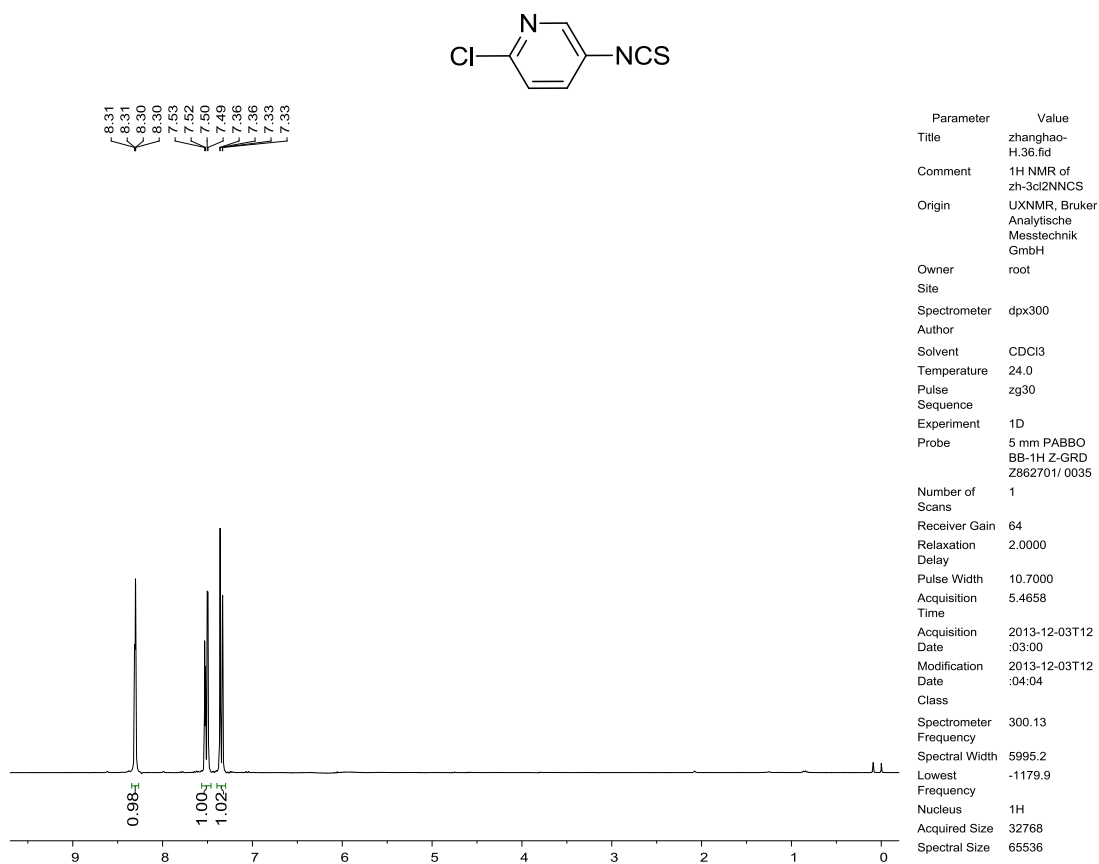Figure S14.  $^{13}\text{C}$ -NMR spectra of compound **4g**.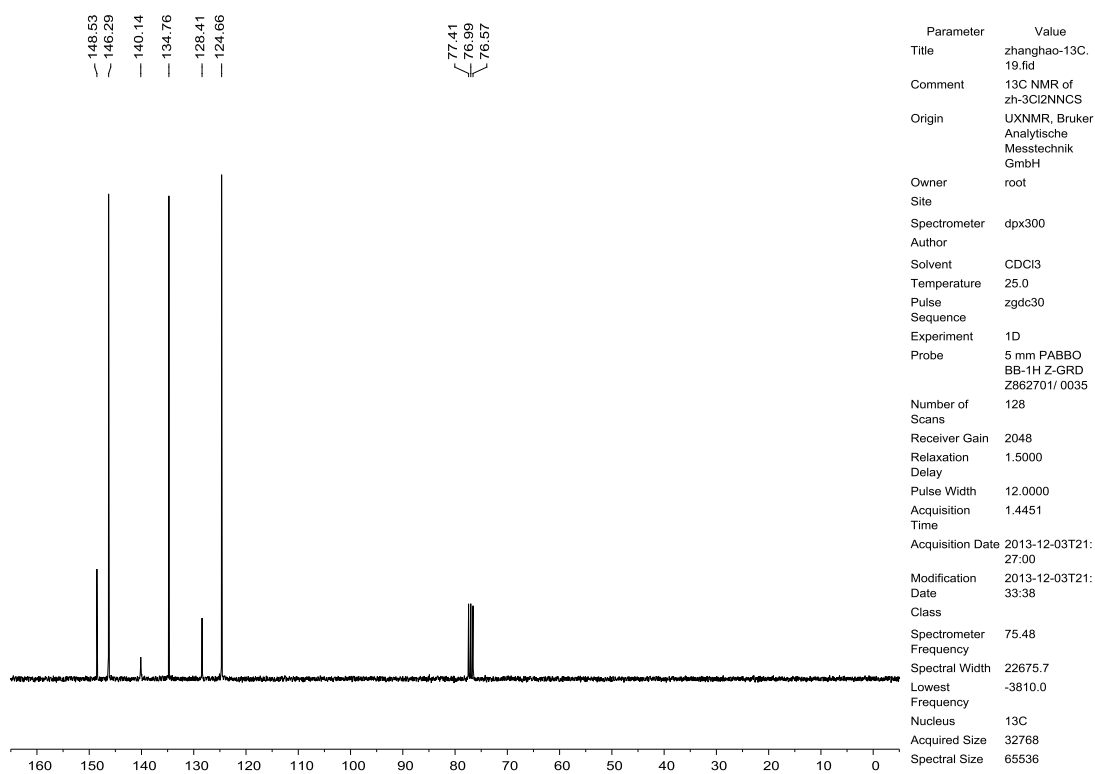



Figure S15.  $^1\text{H}$ -NMR spectra of compound **4h**.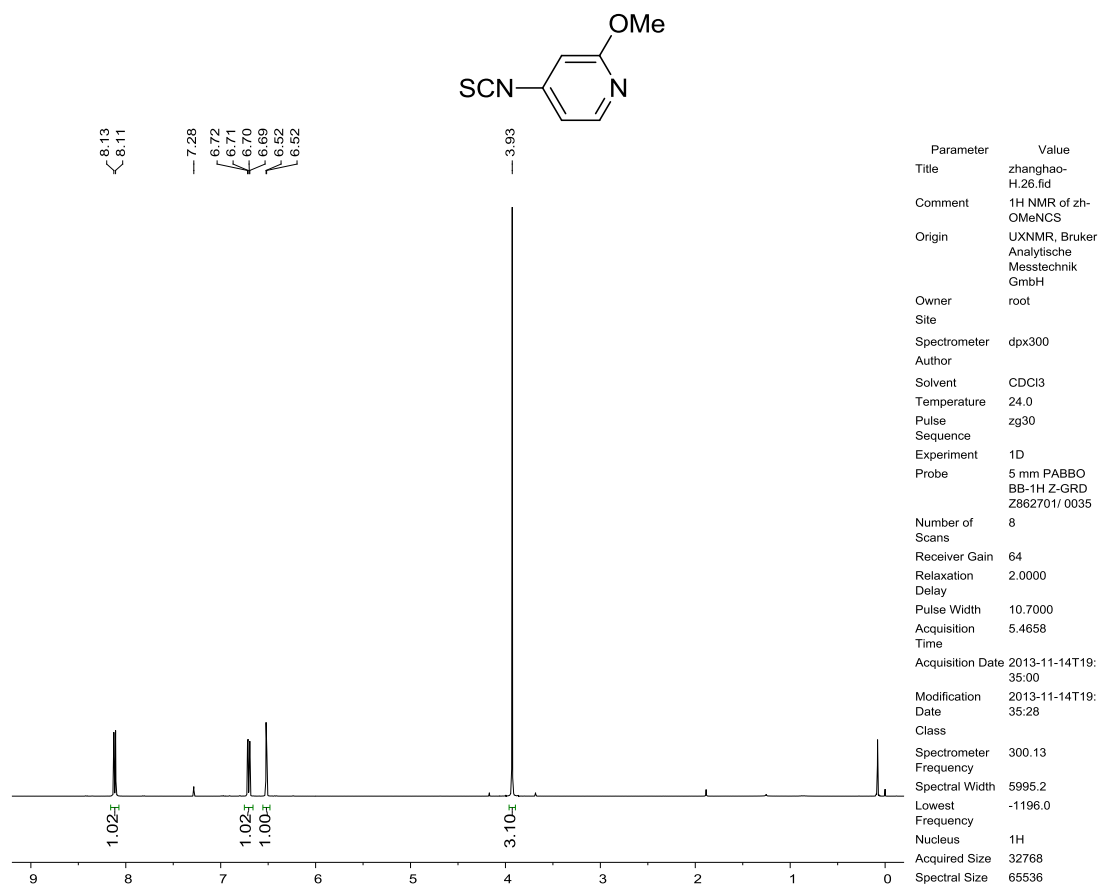Figure S16.  $^{13}\text{C}$ -NMR spectra of compound **4h**.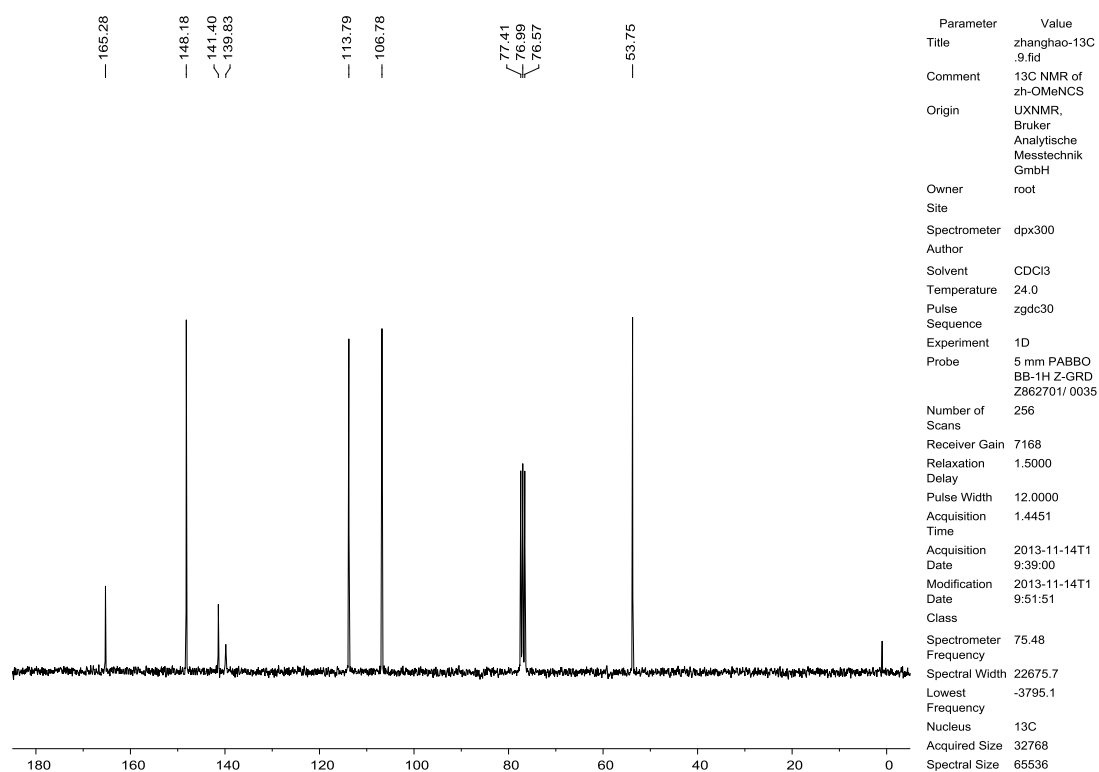

Figure S17.  $^1\text{H}$ -NMR spectra of compound **4i**.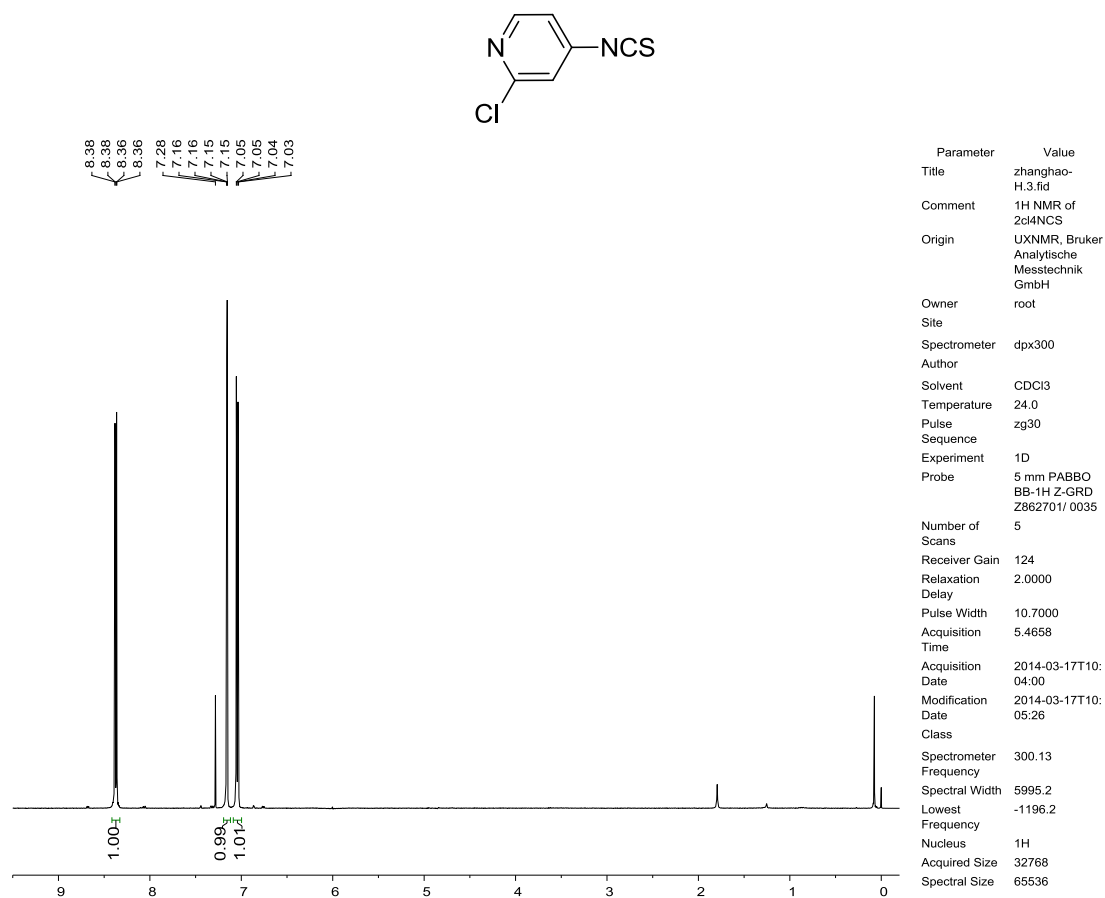Figure S18.  $^{13}\text{C}$ -NMR spectra of compound **4i**.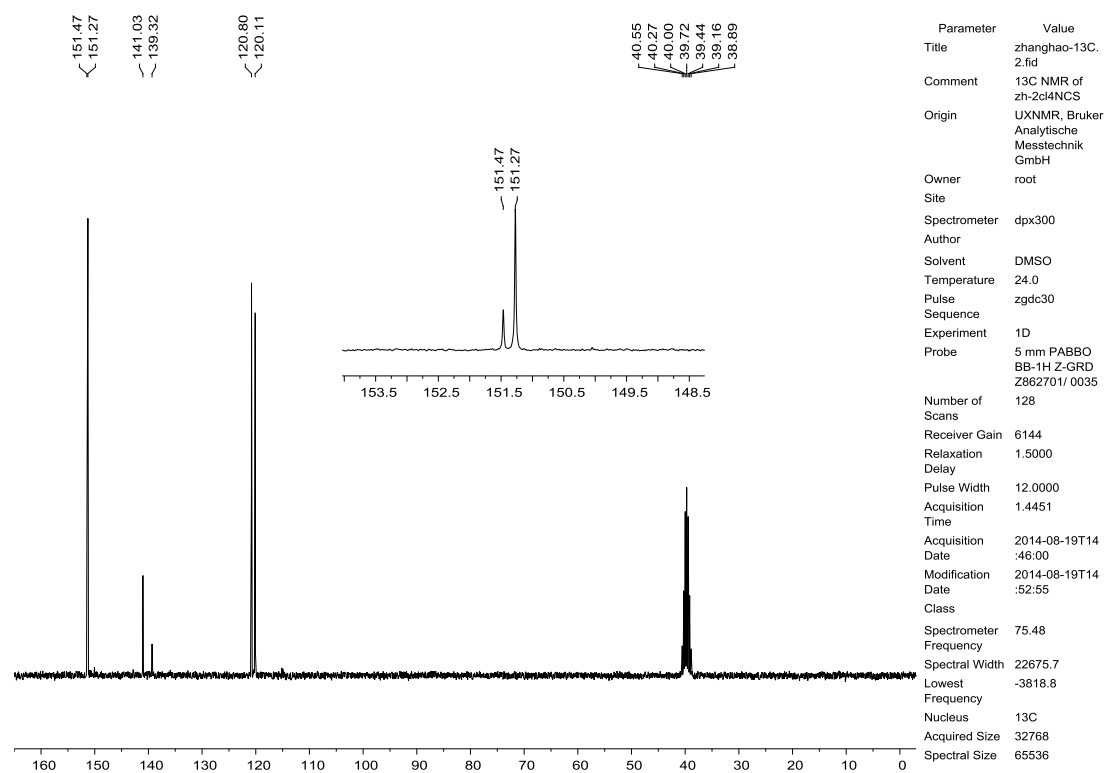

Figure S19. <sup>1</sup>H-NMR spectra of compound 4j.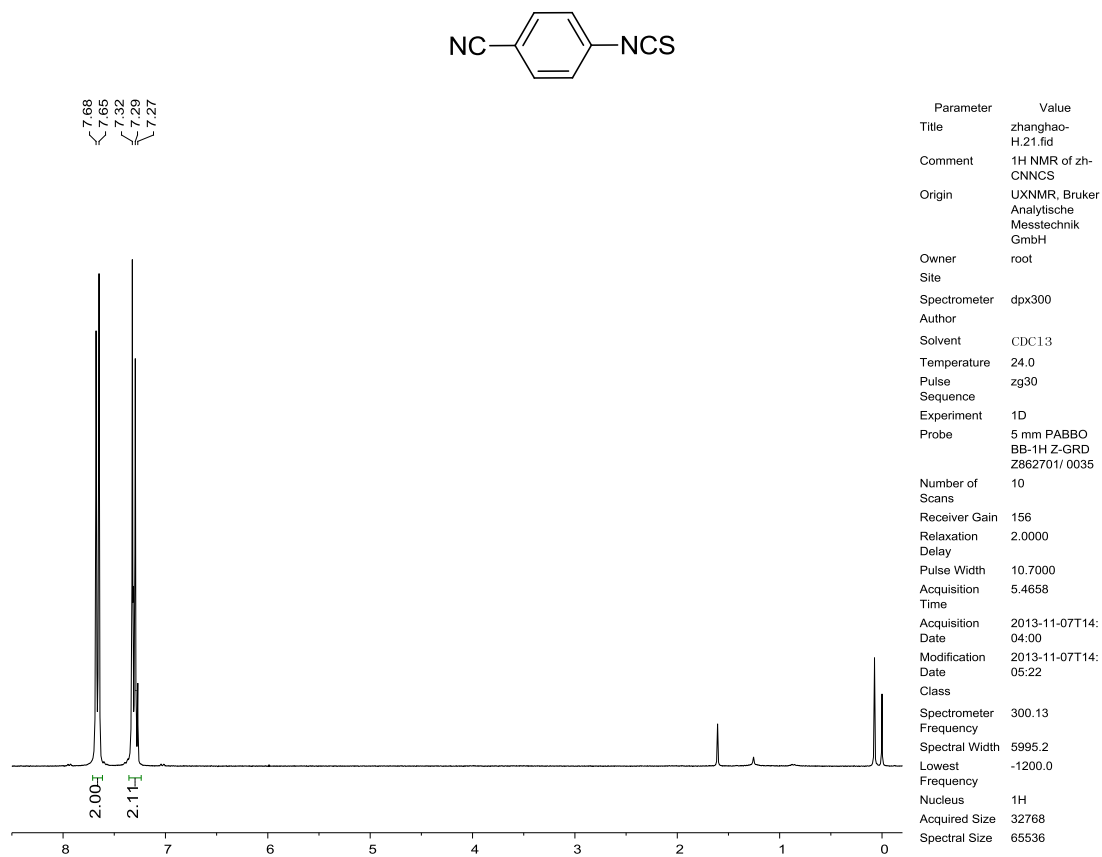Figure S20. <sup>13</sup>C-NMR spectra of compound 4j.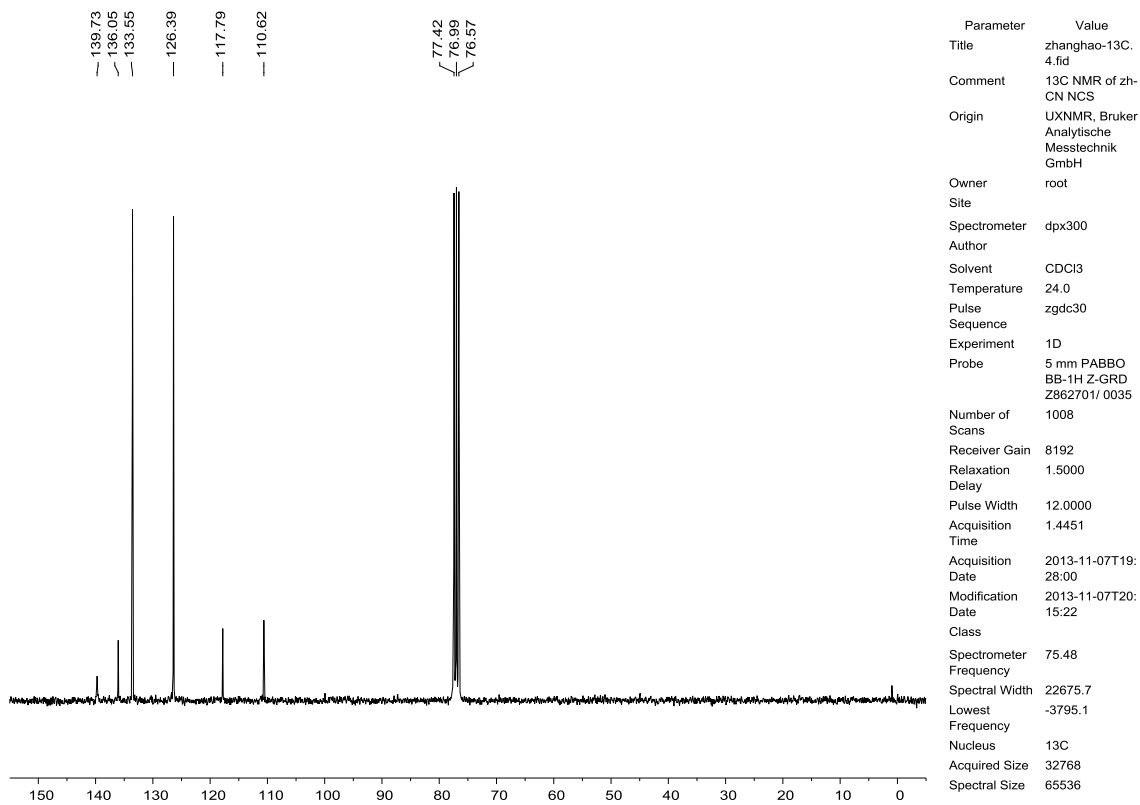

Figure S21.  $^1\text{H}$ -NMR spectra of compound 4k.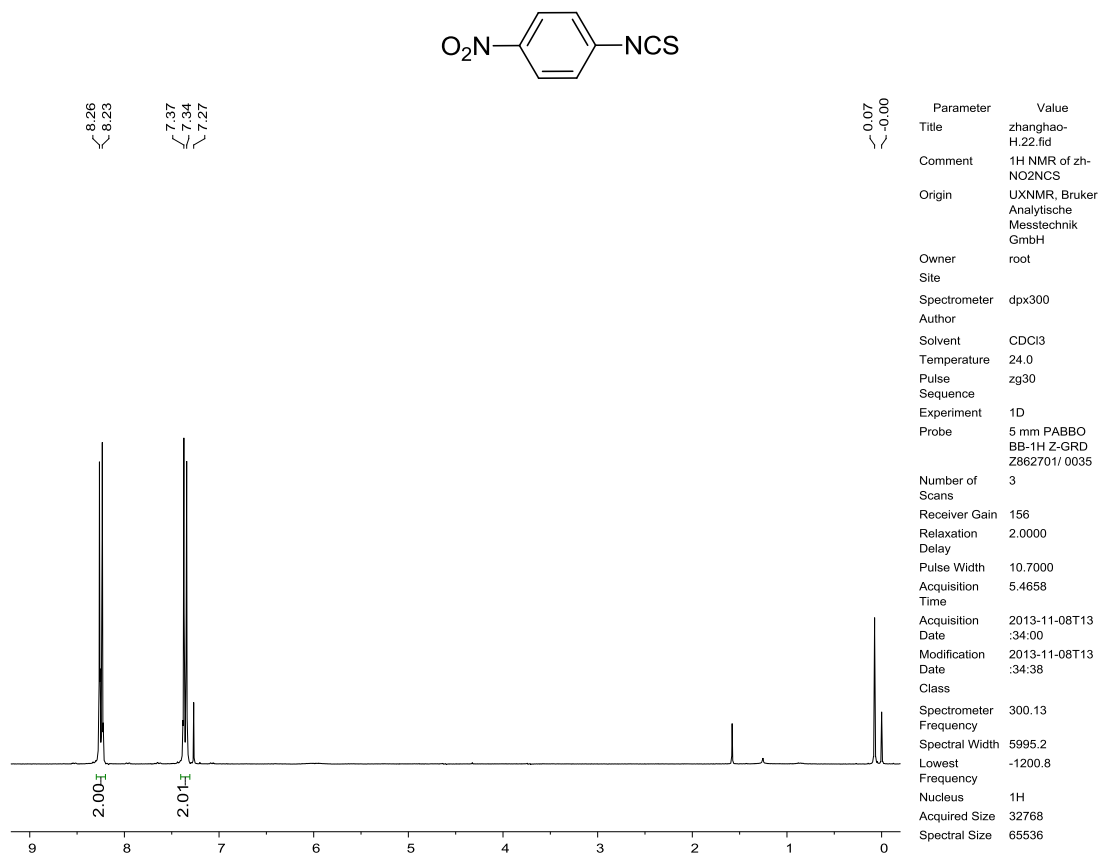Figure S22.  $^{13}\text{C}$ -NMR spectra of compound 4k.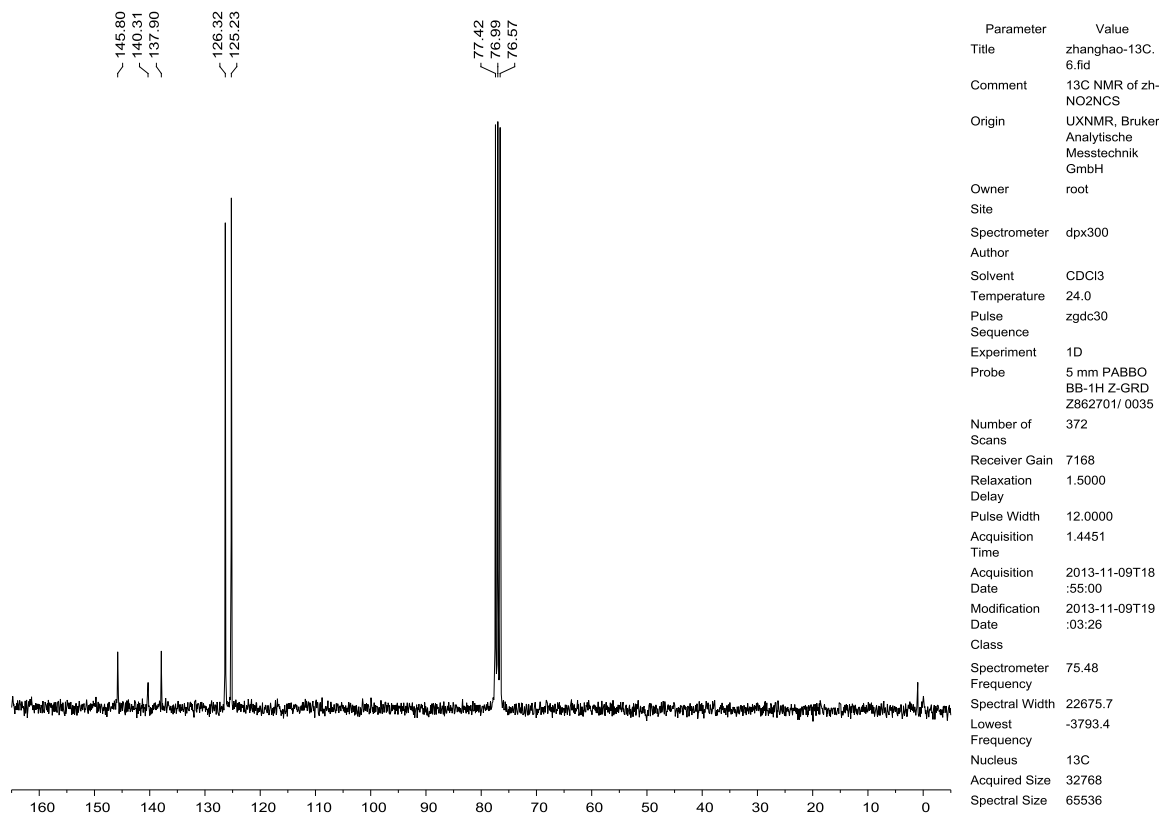

Figure S23.  $^1\text{H}$ -NMR spectra of compound 4I.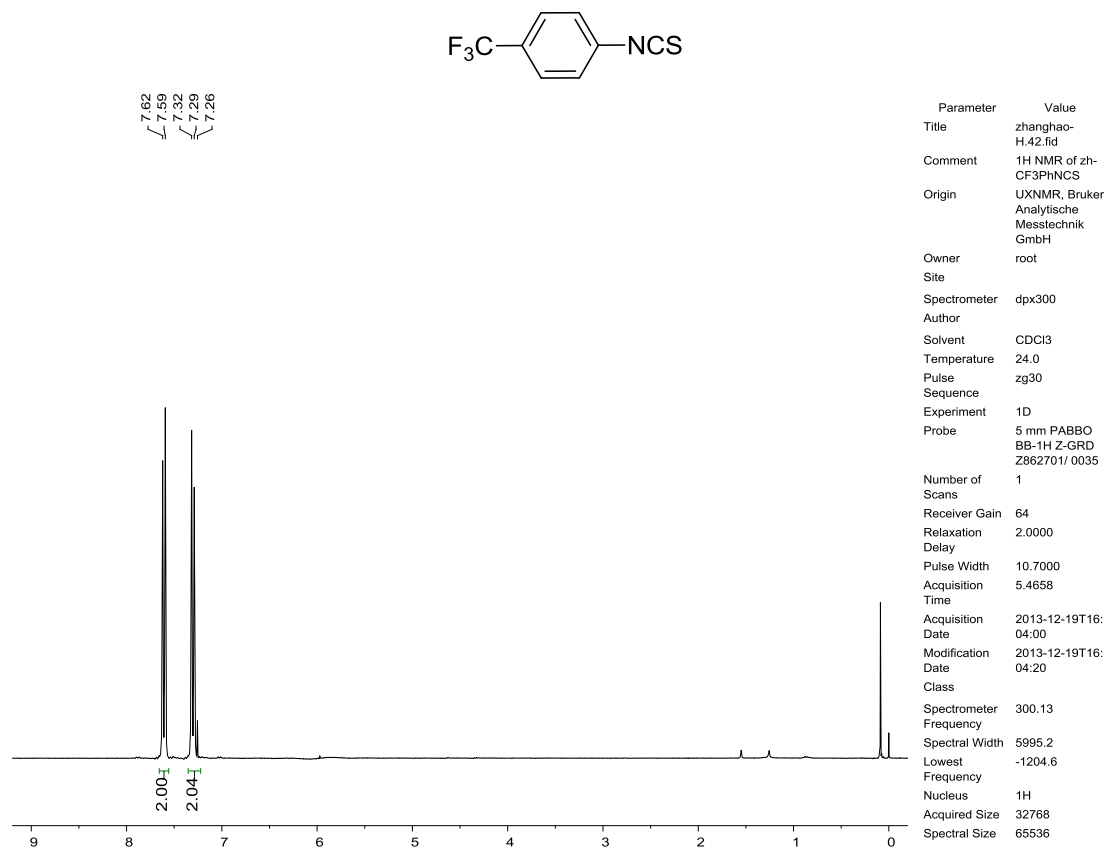Figure S24.  $^{13}\text{C}$ -NMR spectra of compound 4I.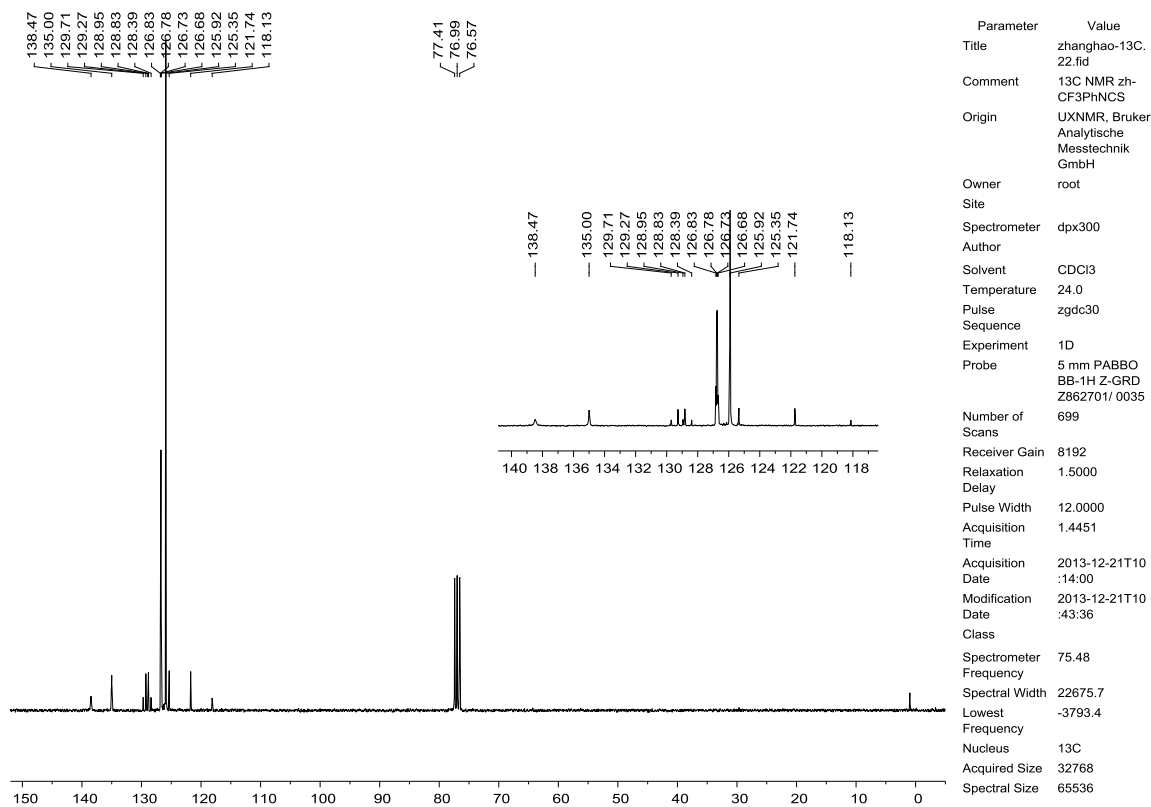

Figure S25.  $^1\text{H}$ -NMR spectra of compound **4m**.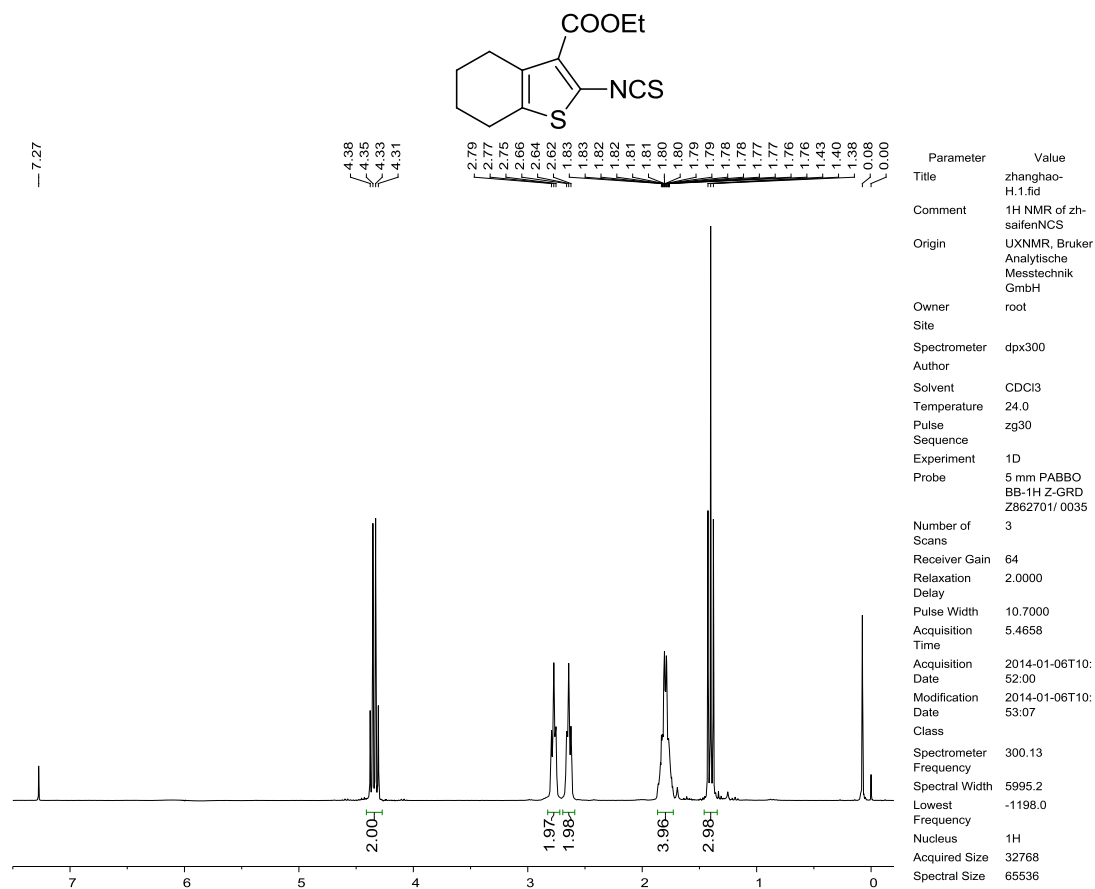Figure S26.  $^{13}\text{C}$ -NMR spectra of compound **4m**.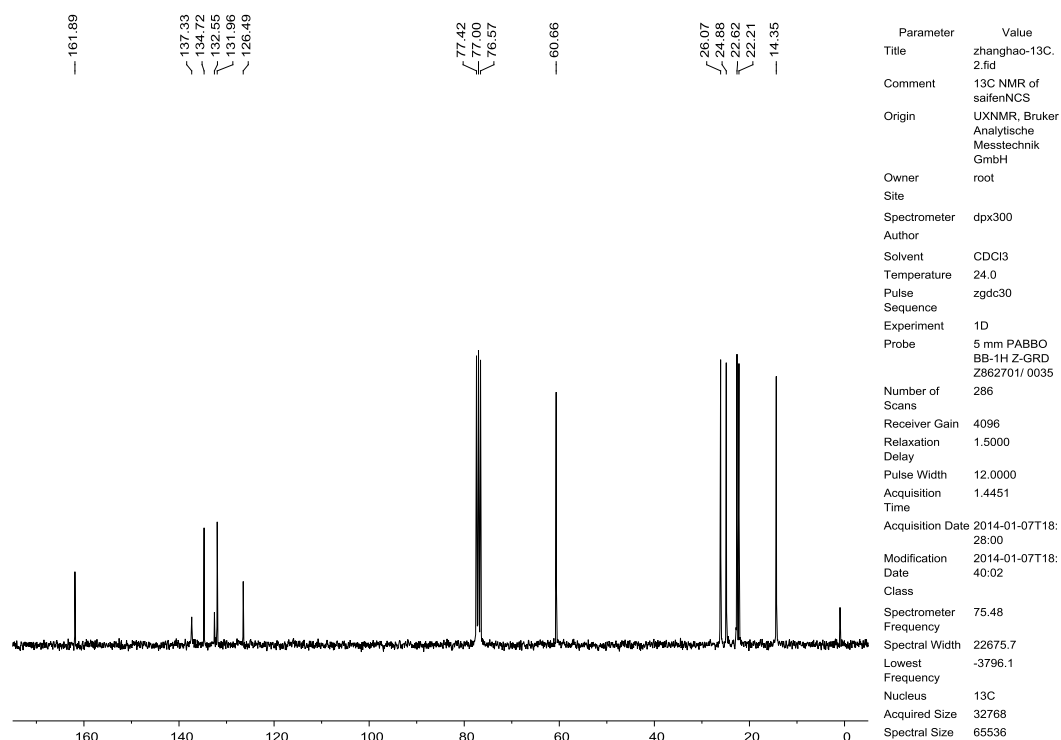

Figure S27.  $^1\text{H}$ -NMR spectra of compound **4n**.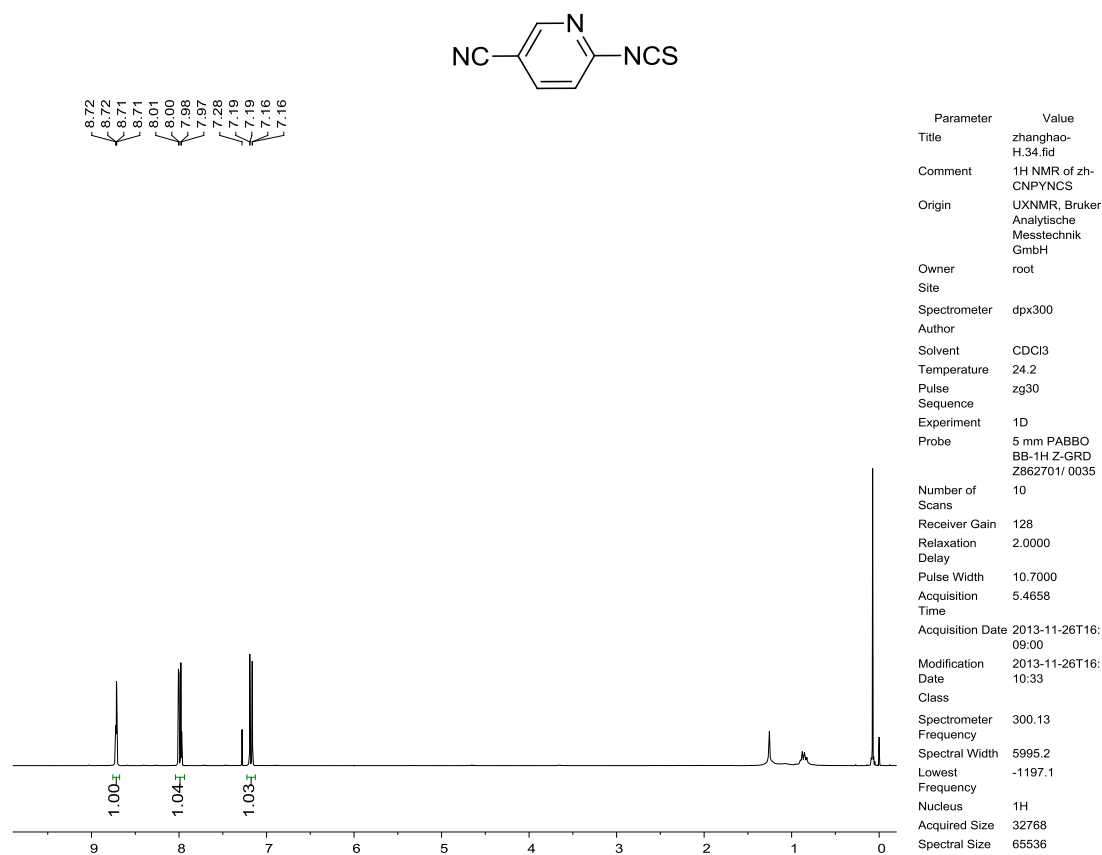Figure S28.  $^{13}\text{C}$ -NMR spectra of compound **4n**.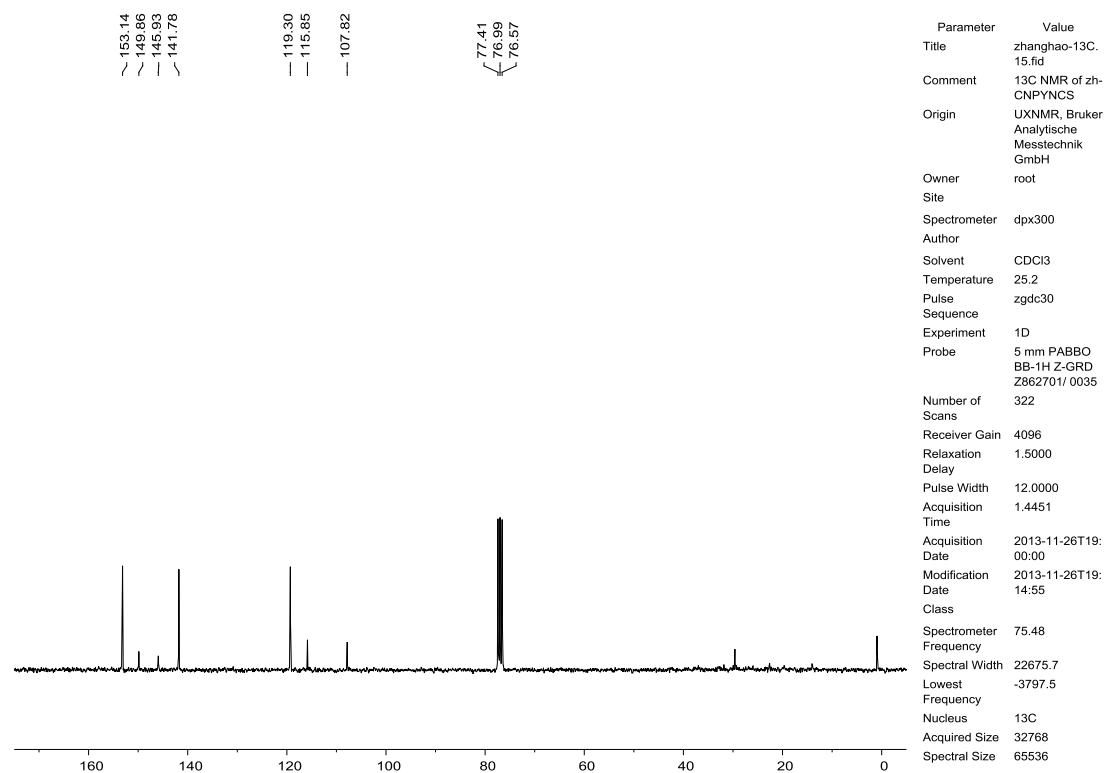

Figure S29.  $^1\text{H}$ -NMR spectra of compound **4o**.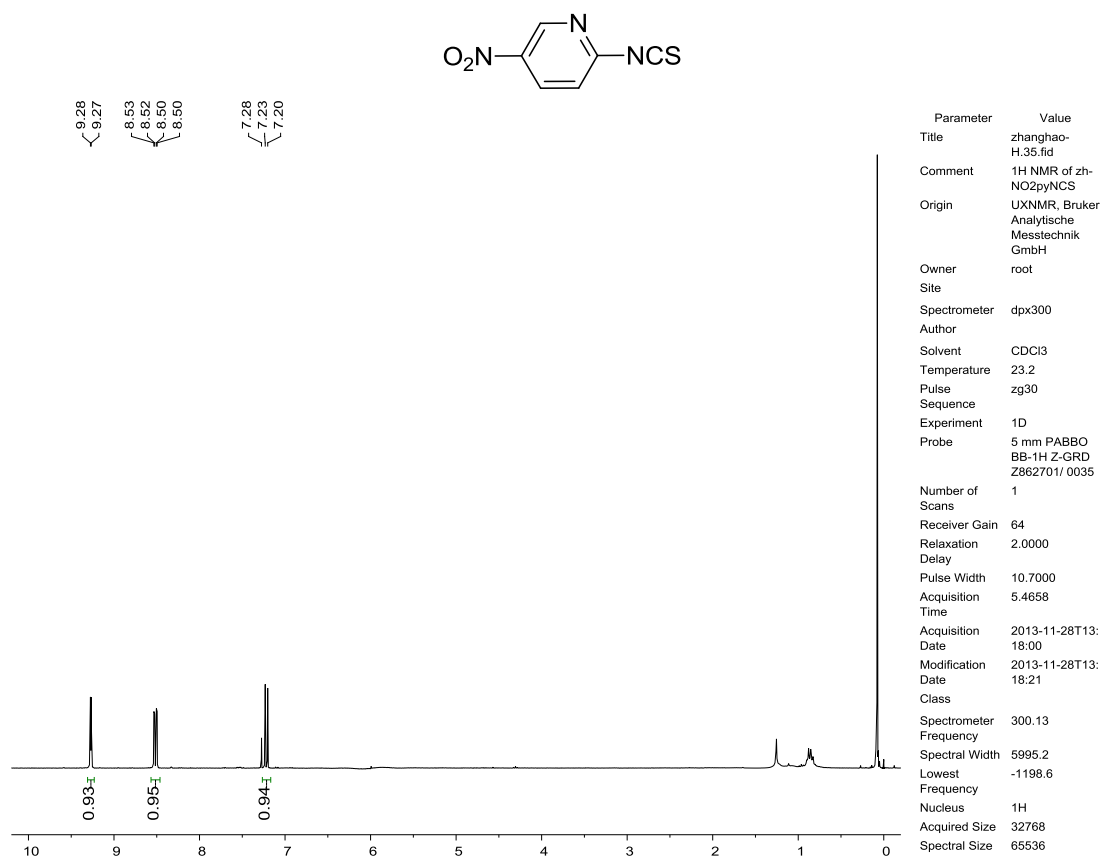Figure S30.  $^{13}\text{C}$ -NMR spectra of compound **4o**.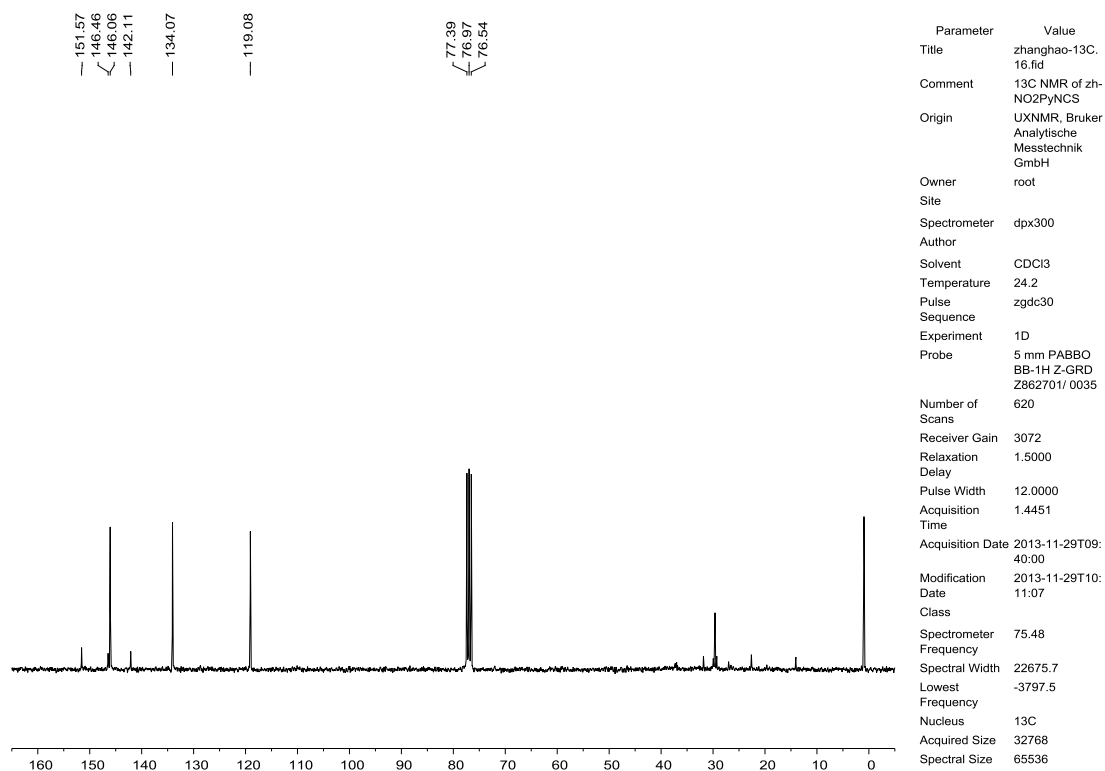



Figure S31. <sup>1</sup>H-NMR spectra of compound 4p.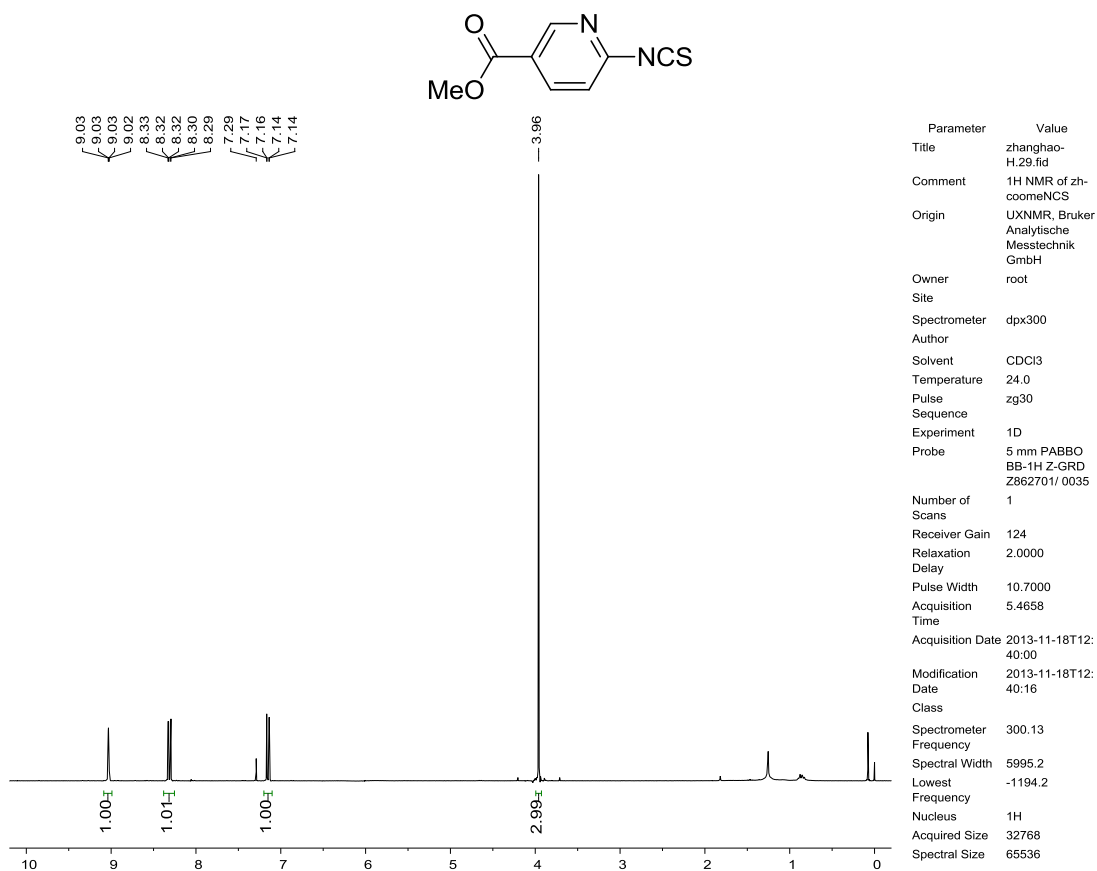Figure S32. <sup>13</sup>C-NMR spectra of compound 4p.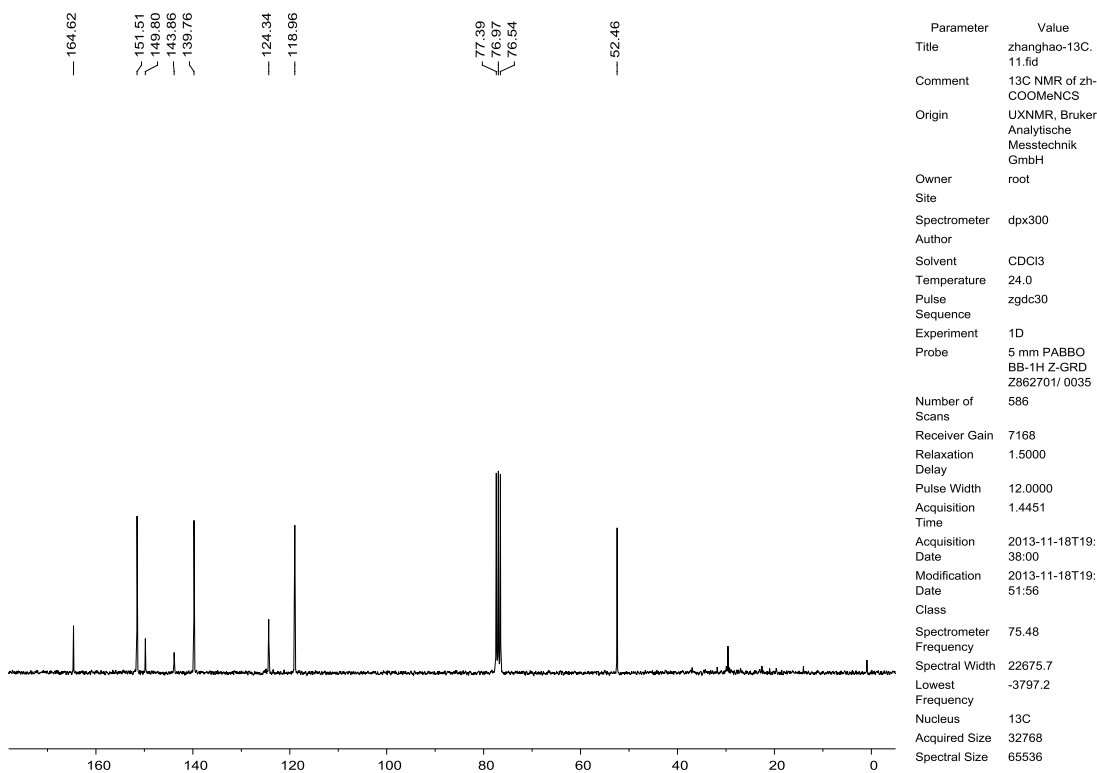

Figure S33.  $^1\text{H}$ -NMR spectra of compound **4q**.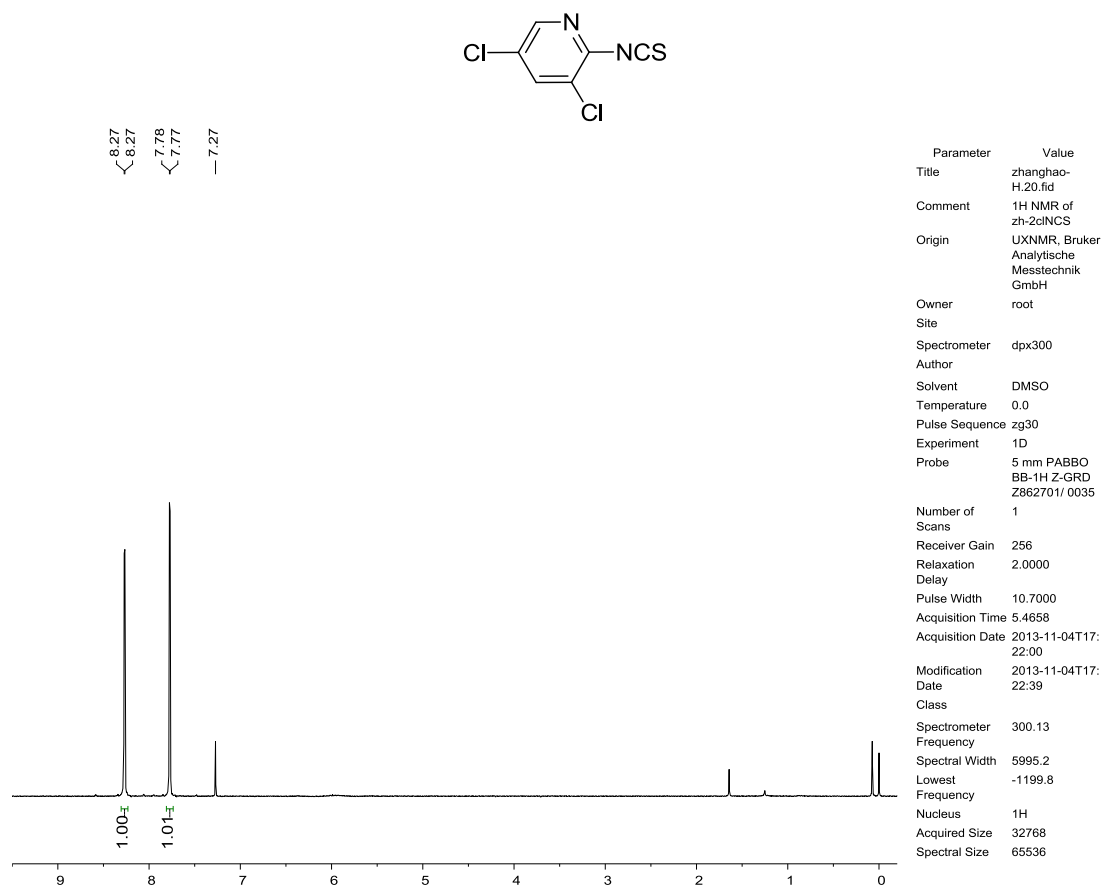Figure S34.  $^{13}\text{C}$ -NMR spectra of compound **4q**.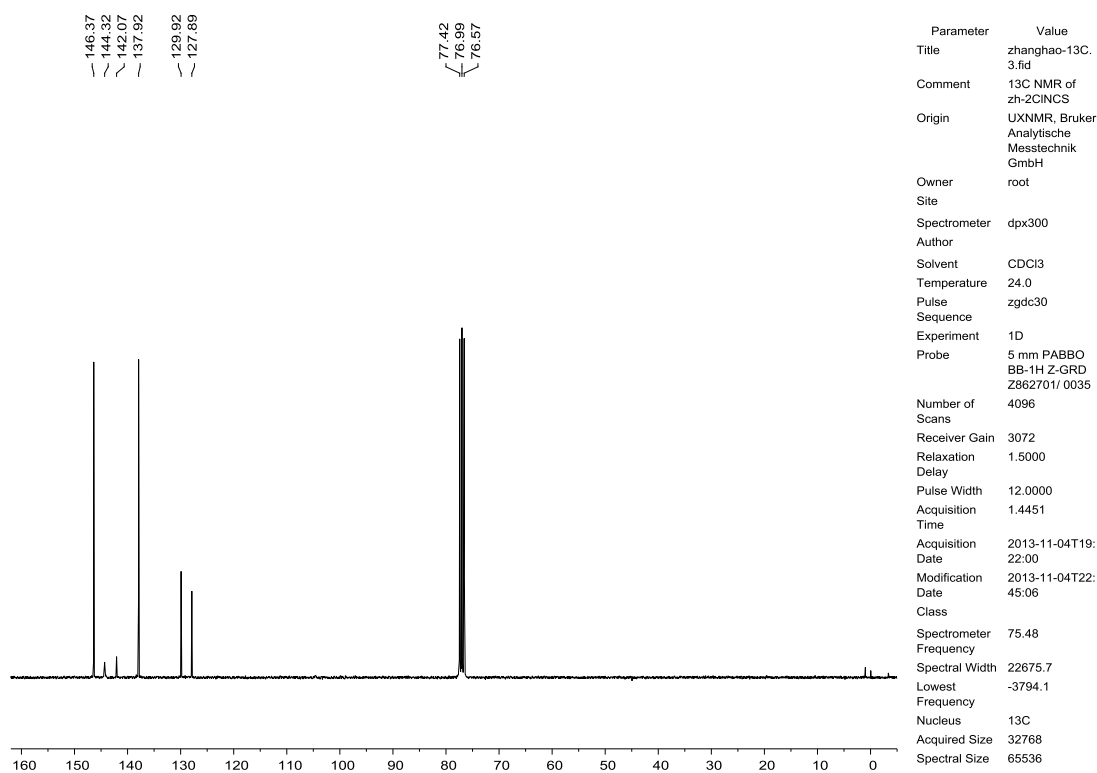

Figure S35.  $^1\text{H}$ -NMR spectra of compound **4r**.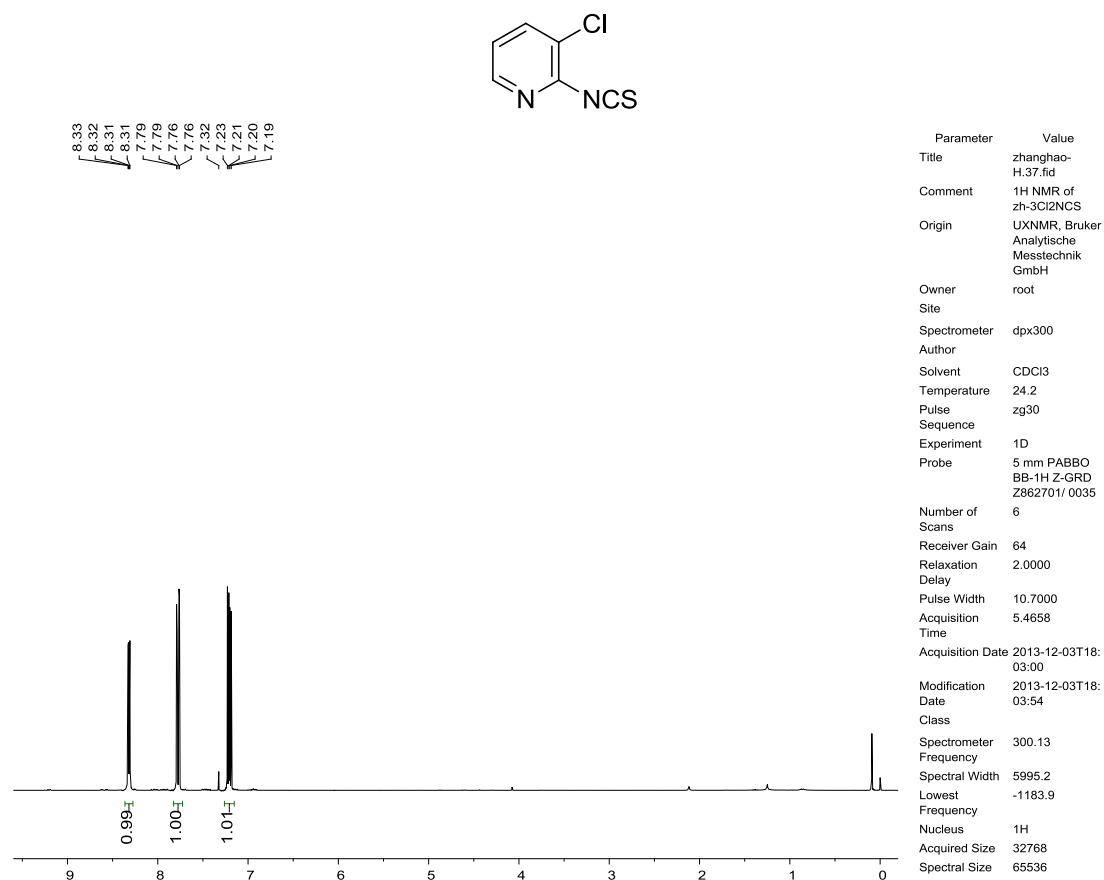Figure S36.  $^{13}\text{C}$ -NMR spectra of compound **4r**.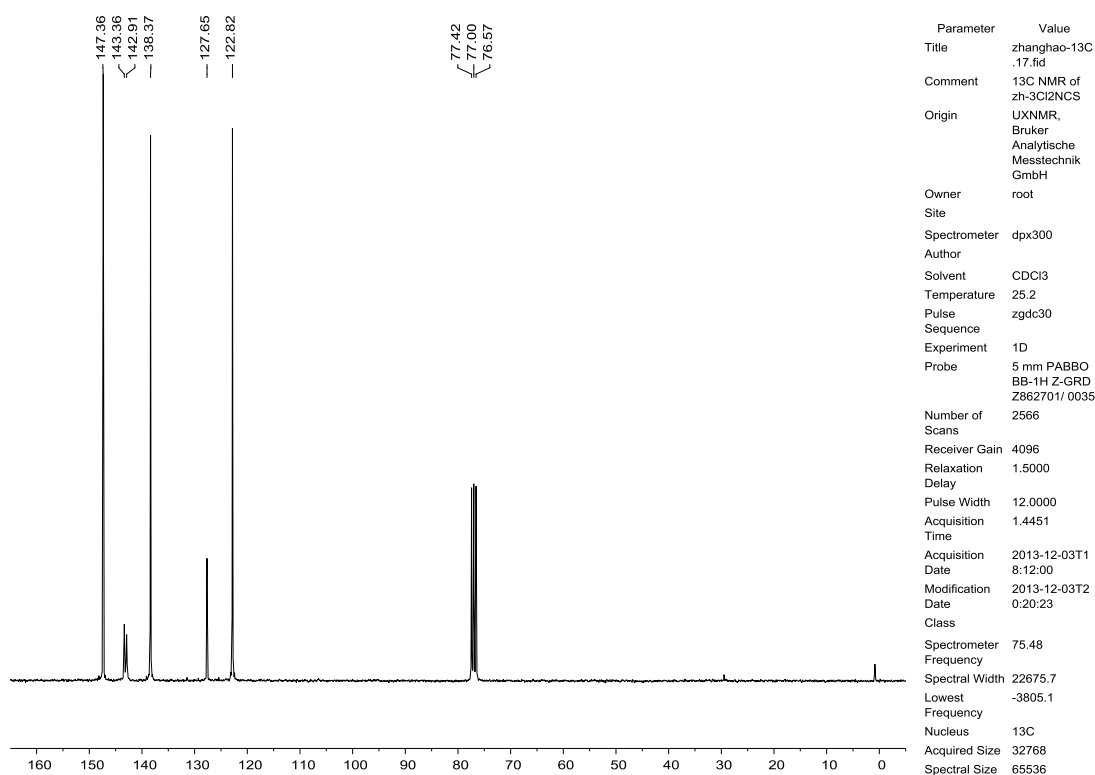

Figure S37.  $^1\text{H}$ -NMR spectra of compound 4s.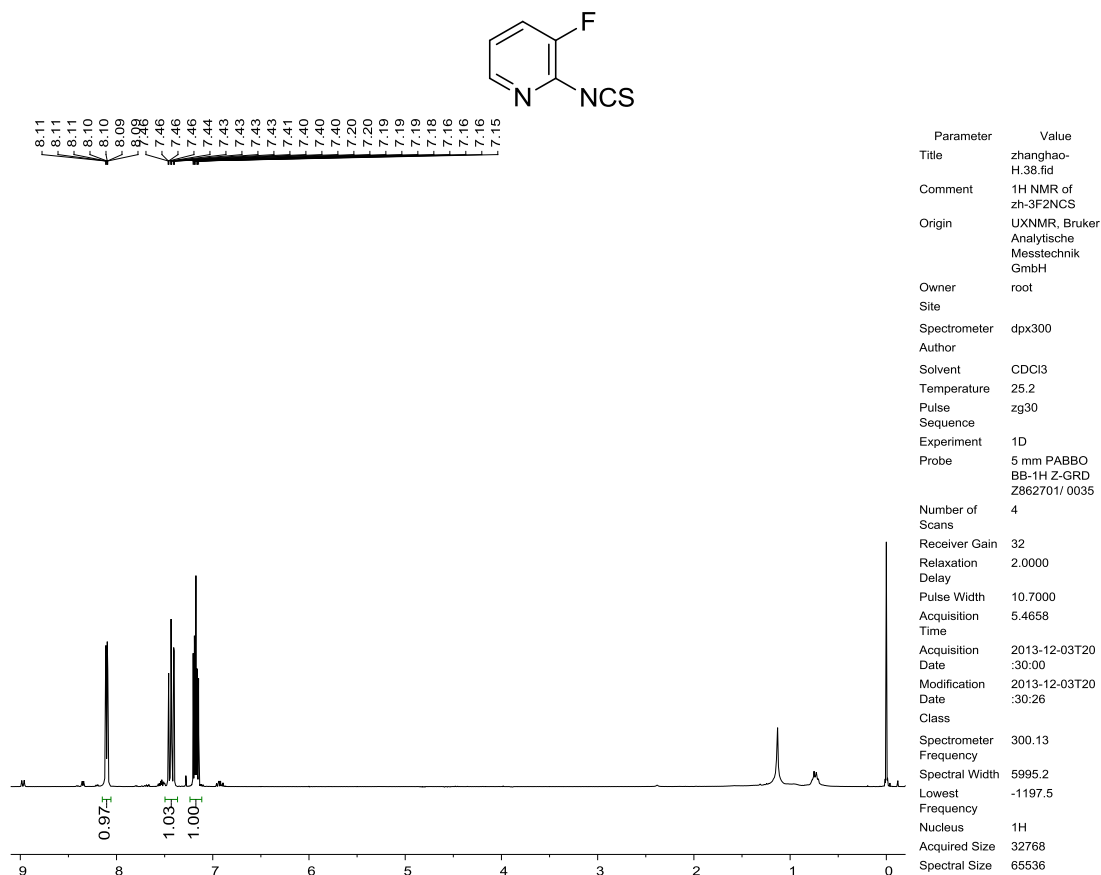Figure S38.  $^{13}\text{C}$ -NMR spectra of compound 4s.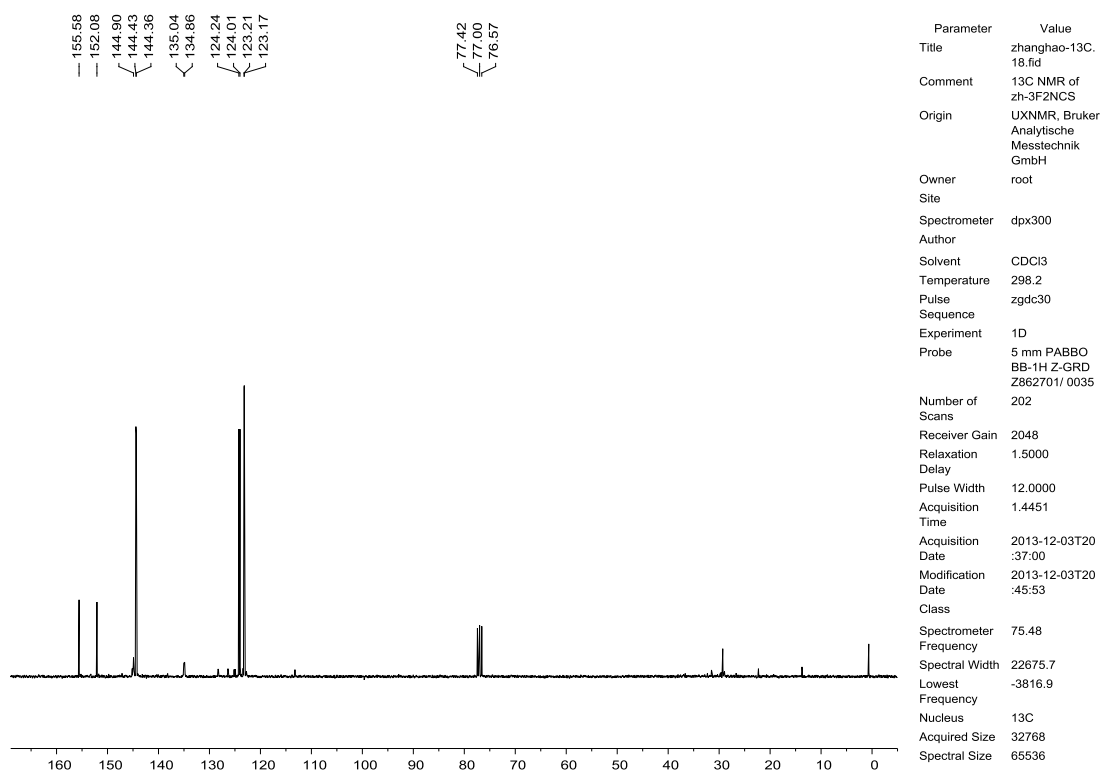

Figure S39.  $^1\text{H}$ -NMR spectra of compound 4t.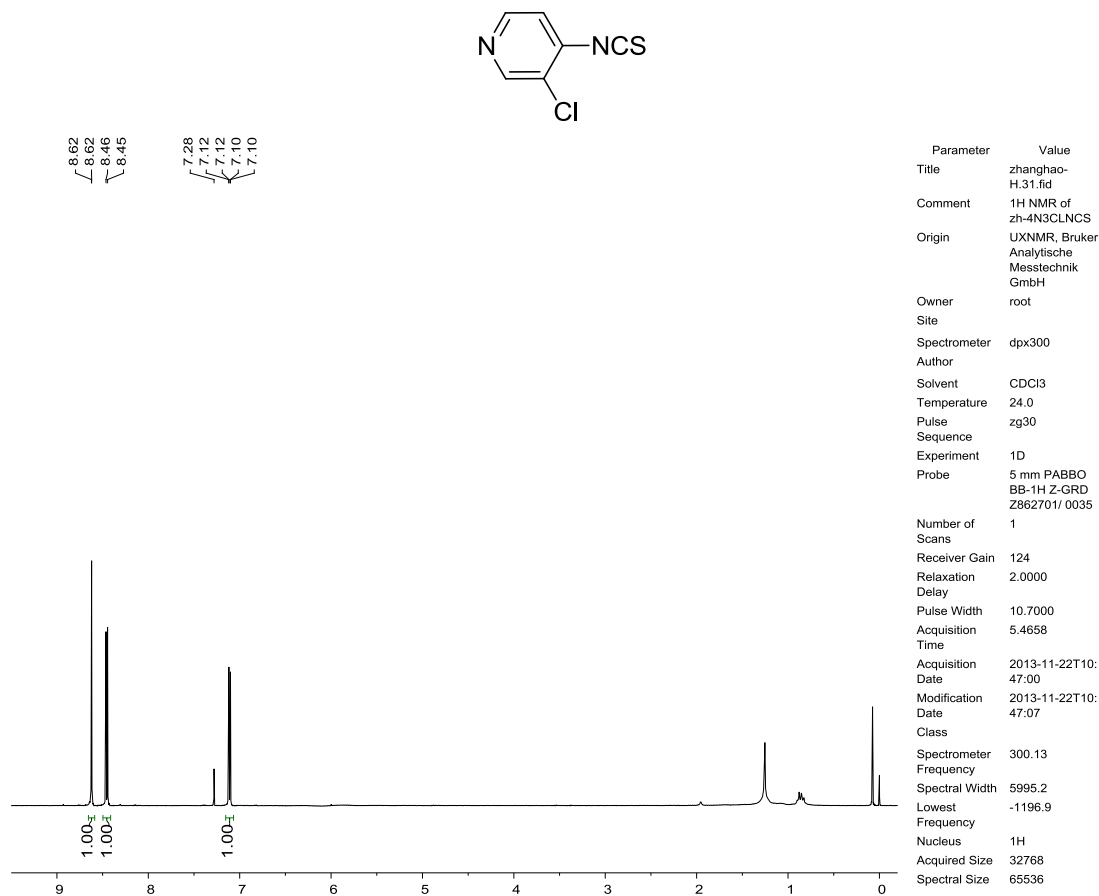Figure S40.  $^{13}\text{C}$ -NMR spectra of compound 4t.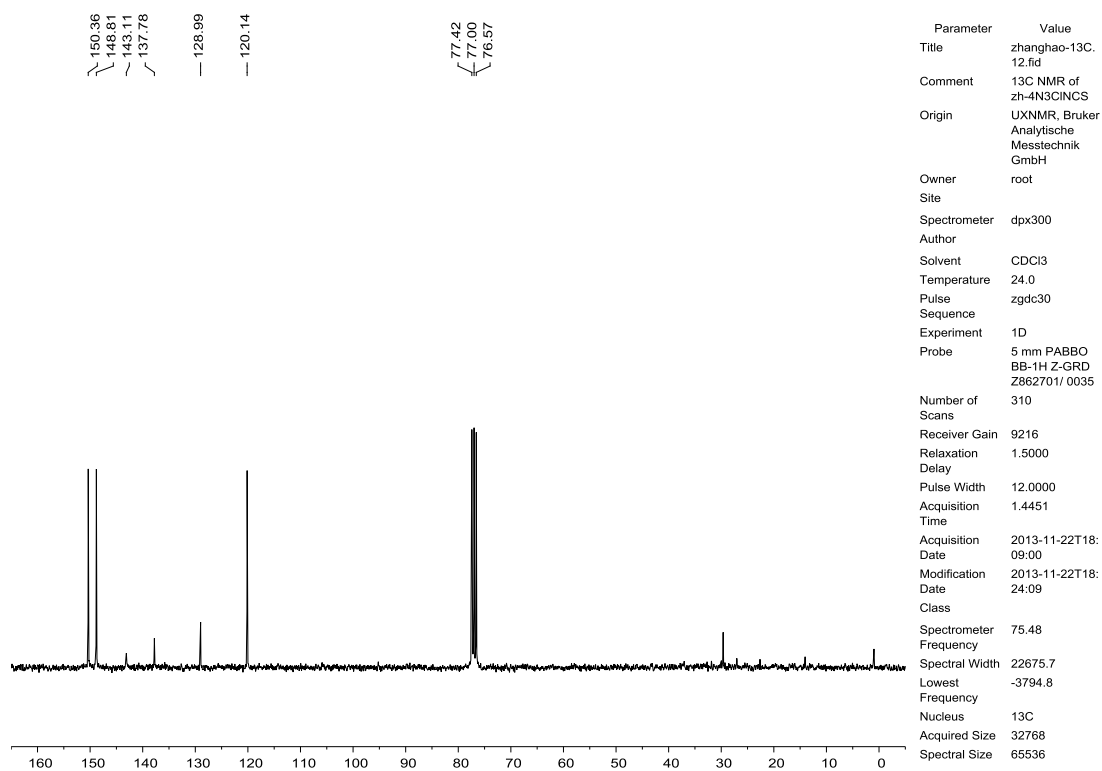

Supplement: s1 [file s1]
